# Supplementary material for: Demonstration of an AI-driven workflow for autonomous high-resolution scanning microscopy
Source: Nat Commun. 2023 Sep 7;14:5501. doi: 10.1038/s41467-023-40339-1 (PMC10485018; doi:10.1038/s41467-023-40339-1)
Supplement: Supplementary file 3 — Source Data [file 41467_2023_40339_MOESM3_ESM.xlsx]

## Sheet: Fig. 3e-f
	scan_coverage	ldr_mses	ur_mses	rg_mses	fast_mses	ldr_ssims	ur_ssims	rg_ssims	fast_ssims			vertical line at scan coverage = 27
0	2.04167	0.43029	0.457142	0.422316	0.448033	0.815171	0.805019	0.819081	0.821707
1	4.125	0.391529	0.407738	0.386744	0.349693	0.838152	0.831524	0.841128	0.863899
2	6.20833	0.362905	0.384799	0.362448	0.295005	0.856704	0.844568	0.858717	0.885355
3	8.29167	0.354721	0.368716	0.34242	0.231974	0.864324	0.855638	0.868781	0.902202
4	10.375	0.332755	0.352468	0.329544	0.19821	0.874881	0.867706	0.87832	0.914476
5	12.4583	0.318419	0.338466	0.312109	0.173063	0.884446	0.876296	0.888651	0.924327
6	14.5417	0.317635	0.325509	0.301915	0.148139	0.887121	0.882964	0.894842	0.936997
7	16.625	0.301914	0.313401	0.292463	0.128744	0.896529	0.890135	0.901763	0.94964
8	18.7083	0.290699	0.305825	0.279157	0.111699	0.902945	0.895763	0.908452	0.960871
9	20.7917	0.279042	0.296059	0.272096	0.0967439	0.909643	0.901624	0.913815	0.970438
10	22.875	0.268479	0.280968	0.259502	0.0808081	0.915362	0.909608	0.919901	0.978992
11	24.9583	0.262036	0.27941	0.248136	0.0654566	0.920173	0.911819	0.926008	0.986092
12	27.0417	0.262171	0.26548	0.243424	0.0561215	0.921187	0.919344	0.929201	0.989881
13	29.125	0.254748	0.259759	0.238207	0.0556969	0.924778	0.923181	0.931635	0.990093
14	31.2083	0.246741	0.260025	0.235073	0.0554202	0.929455	0.924063	0.93418	0.990174
15	33.2917	0.238097	0.244843	0.230408	0.0553965	0.933785	0.930382	0.936915	0.990226
16	35.375	0.232905	0.241099	0.224796	0.055215	0.93721	0.933193	0.939793	0.990473
17	37.4583	0.223308	0.232474	0.219672	0.0551956	0.941013	0.937419	0.94229	0.990516
18	39.5417	0.21612	0.226444	0.217776	0.055156	0.945532	0.940558	0.944061	0.990569
19	41.625	0.212334	0.219124	0.214184	0.0548803	0.947703	0.944053	0.94624	0.990707
20	43.7083	0.203151	0.216023	0.208114	0.0545935	0.951428	0.945816	0.949401	0.990868
21	45.7917	0.196693	0.208594	0.203234	0.0541005	0.954583	0.949722	0.951693	0.991102
22	47.875	0.190149	0.202275	0.19929	0.0529549	0.957565	0.952547	0.953724	0.991633
23	49.9583	0.183083	0.197049	0.194836	0.0521357	0.960423	0.954559	0.956256	0.992142
24	52.0417	0.187543	0.190988	0.189856	0.0509375	0.958485	0.958051	0.958095	0.9929
25	54.125	0.180927	0.184065	0.186902	0.0493272	0.961326	0.960245	0.959798	0.99384
26	56.2083	0.175563	0.181293	0.181937	0.0478441	0.964156	0.962171	0.96224	0.994415
27	58.2917	0.171914	0.172676	0.17715	0.045849	0.965485	0.965446	0.964339	0.994886
28	60.375	0.164265	0.167089	0.172032	0.0436134	0.968385	0.967607	0.966402	0.995454
29	62.4583	0.160342	0.161691	0.165787	0.0420607	0.970206	0.969725	0.968549	0.995838
30	64.5417	0.154248	0.157453	0.160051	0.0410904	0.972508	0.971379	0.970259	0.996043
31	66.625	0.148111	0.148101	0.159096	0.0400062	0.974759	0.974421	0.971313	0.996206
32	68.7083	0.142413	0.14194	0.150653	0.0383843	0.976579	0.976321	0.973784	0.996394
33	70.7917	0.137491	0.139224	0.14827	0.0363162	0.978324	0.97766	0.975221	0.996565
34	72.875	0.13088	0.131676	0.141466	0.0339853	0.980238	0.979785	0.977791	0.996732
35	74.9583	0.124814	0.12621	0.135709	0.0317369	0.982127	0.981484	0.97912	0.996994
36	77.0417	0.116506	0.118331	0.12823	0.0288252	0.984291	0.983434	0.981616	0.997395
37	79.125	0.111596	0.114341	0.121976	0.0270354	0.98553	0.984786	0.983428	0.9977
38	81.2083	0.103509	0.105678	0.117723	0.0216269	0.987497	0.986806	0.98431	0.998506
39	83.2917	0.097559	0.102074	0.110683	0.0188079	0.98897	0.987955	0.986025	0.999039
40	85.375	0.0950407	0.0928697	0.100489	0.017076	0.989589	0.990056	0.988859	0.999217
41	87.4583	0.0859857	0.0855547	0.0944399	0.0145637	0.991299	0.991215	0.989755	0.999439
42	89.5417	0.0791819	0.0774665	0.0845225	0.013586	0.992806	0.99304	0.991822	0.999513
43	91.625	0.0673208	0.0698978	0.0757094	0.0110024	0.994782	0.994409	0.99359	0.999694
44	93.7083	0.0606438	0.0595801	0.0679019	0.0093764	0.995707	0.995863	0.994972	0.999777
45	95.7917	0.0496914	0.0477622	0.0538918	0.00572456	0.997181	0.997342	0.996752	0.999922
46	97.875	0.0335173	0.0352419	0.034527	0.00382496	0.998687	0.998504	0.998412	0.999988
47	99.9583	0.00306848	0.00525125		7.4863e-06	0.99999	0.999974		1

## Sheet: Sup Fig. 1
	scan_coverage_batch_1	mse_batch_1	ssim_batch_1	scan_coverage_batch_50	mse_batch_50	ssim_batch_50
0	1.20792	0.491573	0.802859	2.04167	0.448033	0.821707
1	1.41625	0.459031	0.812672	4.125	0.349693	0.863899
2	1.62458	0.415557	0.823387	6.20833	0.295005	0.885355
3	1.83292	0.400286	0.828837	8.29167	0.231974	0.902202
4	2.04125	0.38779	0.83452	10.375	0.19821	0.914476
5	2.24958	0.376295	0.83896
6	2.45792	0.36586	0.842976
7	2.66625	0.356692	0.847095
8	2.87458	0.34759	0.85056
9	3.08292	0.341209	0.853749
10	3.29125	0.335191	0.857122
11	3.49958	0.326367	0.860188
12	3.70792	0.321052	0.862335
13	3.91625	0.314699	0.864867
14	4.12458	0.31002	0.867506
15	4.33292	0.306684	0.86914
16	4.54125	0.300771	0.871887
17	4.74958	0.295952	0.873863
18	4.95792	0.290693	0.876338
19	5.16625	0.28556	0.878917
20	5.37458	0.277709	0.88056
21	5.58292	0.27321	0.882343
22	5.79125	0.268949	0.884469
23	5.99958	0.26495	0.886071
24	6.20792	0.261376	0.887511
25	6.41625	0.257568	0.88881
26	6.62458	0.25397	0.890351
27	6.83292	0.249309	0.892326
28	7.04125	0.245838	0.893652
29	7.24958	0.242227	0.895083
30	7.45792	0.238706	0.896463
31	7.66625	0.235537	0.897761
32	7.87458	0.232436	0.898856
33	8.08292	0.228346	0.900377
34	8.29125	0.225469	0.901372

## Sheet: Sup Fig. 2b-c
	camera_scan_coverage	camera_ssim	camera_mse	cameraman_scan_coverage	cameraman_ssim	cameraman_mse	clock_scan_coverage	clock_ssim	clock_mse	combined_scan_coverage	combined_ssim	combined_mse	female_scan_coverage	female_ssim	female_mse	house_scan_coverage	house_ssim	house_mse	jellybeans_scan_coverage	jellybeans_ssim	jellybeans_mse	lake_scan_coverage	lake_ssim	lake_mse	male_scan_coverage	male_ssim	male_mse	mandrill_scan_coverage	mandrill_ssim	mandrill_mse	peppers_scan_coverage	peppers_ssim	peppers_mse	plane_scan_coverage	plane_ssim	plane_mse
0	0.994873	0.474129	0.843058	0.994873	0.474129	0.843058	0.994873	0.474129	0.843058	0.994873	0.474129	0.843058	0.994873	0.474129	0.843058	0.994873	0.474129	0.843058	0.994873	0.474129	0.843058	0.994873	0.474129	0.843058	0.994873	0.474129	0.843058	0.994873	0.474129	0.843058	0.994873	0.474129	0.843058	0.994873	0.474129	0.843058
1	2.52075	0.488749	0.757454	2.52075	0.473873	0.74269	2.52075	0.523274	0.669452	2.52075	0.521358	0.707705	2.52075	0.472753	0.69778	2.52075	0.518414	0.674376	2.52075	0.528174	0.716196	2.52075	0.472947	0.810768	2.52075	0.53239	0.654876	2.52075	0.469266	0.747804	2.52075	0.499052	0.700548	2.52075	0.446029	0.766442
2	4.04663	0.55636	0.632094	4.04663	0.537905	0.683381	4.04663	0.530497	0.624152	4.04663	0.562111	0.617797	4.04663	0.517416	0.625469	4.04663	0.576647	0.593246	4.04663	0.564631	0.650076	4.04663	0.530416	0.701394	4.04663	0.589392	0.596588	4.04663	0.556129	0.631248	4.04663	0.553205	0.586333	4.04663	0.539512	0.668341
3	5.57251	0.60816	0.577631	5.57251	0.568707	0.622005	5.57251	0.587026	0.543588	5.57251	0.562015	0.564792	5.57251	0.579785	0.578938	5.57251	0.625096	0.545262	5.57251	0.589167	0.622502	5.57251	0.582598	0.614329	5.57251	0.617955	0.552045	5.57251	0.641134	0.521225	5.57251	0.585453	0.542233	5.57251	0.562817	0.620363
4	7.09839	0.656545	0.505064	7.09839	0.607023	0.563249	7.09839	0.628842	0.505371	7.09839	0.59736	0.514108	7.09839	0.617673	0.513179	7.09839	0.643464	0.516226	7.09839	0.633503	0.545415	7.09839	0.60502	0.582318	7.09839	0.652079	0.505333	7.09839	0.681719	0.49591	7.09839	0.626735	0.505648	7.09839	0.615787	0.55069
5	8.62427	0.690902	0.452576	8.62427	0.665406	0.493101	8.62427	0.654455	0.46765	8.62427	0.64724	0.46261	8.62427	0.659174	0.459809	8.62427	0.677431	0.468983	8.62427	0.665724	0.512753	8.62427	0.624314	0.488437	8.62427	0.679052	0.469377	8.62427	0.705107	0.454952	8.62427	0.65563	0.430585	8.62427	0.662571	0.501685
6	10.1501	0.723589	0.404344	10.1501	0.701524	0.461644	10.1501	0.66626	0.409595	10.1501	0.665713	0.443325	10.1501	0.695924	0.391212	10.1501	0.692555	0.426002	10.1501	0.691892	0.467902	10.1501	0.68468	0.430222	10.1501	0.707118	0.403027	10.1501	0.724728	0.404661	10.1501	0.69371	0.37559	10.1501	0.687415	0.464163
7	11.676	0.755418	0.353361	11.676	0.734059	0.420699	11.676	0.717444	0.355865	11.676	0.708998	0.357185	11.676	0.732339	0.313675	11.676	0.735901	0.348629	11.676	0.705391	0.415326	11.676	0.714745	0.363715	11.676	0.742938	0.357165	11.676	0.749149	0.350841	11.676	0.727977	0.351727	11.676	0.740838	0.390624
8	13.2019	0.789925	0.314753	13.2019	0.745722	0.366014	13.2019	0.76022	0.311007	13.2019	0.760595	0.284662	13.2019	0.782877	0.25576	13.2019	0.771168	0.310406	13.2019	0.748504	0.345339	13.2019	0.759371	0.291667	13.2019	0.78226	0.298357	13.2019	0.782066	0.294724	13.2019	0.775427	0.300104	13.2019	0.765168	0.324347
9	14.7278	0.806276	0.290786	14.7278	0.782928	0.301051	14.7278	0.789274	0.274905	14.7278	0.796335	0.21541	14.7278	0.803311	0.223662	14.7278	0.803401	0.266507	14.7278	0.786641	0.290251	14.7278	0.790521	0.246363	14.7278	0.803607	0.261451	14.7278	0.814724	0.237252	14.7278	0.807157	0.269312	14.7278	0.79355	0.272261
10	16.2537	0.825664	0.249003	16.2537	0.805395	0.25551	16.2537	0.807242	0.235627	16.2537	0.827394	0.179118	16.2537	0.824492	0.181533	16.2537	0.839866	0.218941	16.2537	0.809178	0.244808	16.2537	0.829557	0.198814	16.2537	0.819713	0.220842	16.2537	0.841842	0.210435	16.2537	0.829384	0.226596	16.2537	0.815777	0.240912
11	17.7795	0.848986	0.208624	17.7795	0.824907	0.206219	17.7795	0.82556	0.202397	17.7795	0.840759	0.163928	17.7795	0.855451	0.134206	17.7795	0.856698	0.198123	17.7795	0.831518	0.206286	17.7795	0.850219	0.163077	17.7795	0.851766	0.173254	17.7795	0.863115	0.19056	17.7795	0.850634	0.185382	17.7795	0.842091	0.208365
12	19.3054	0.866434	0.192499	19.3054	0.848614	0.175697	19.3054	0.850266	0.190922	19.3054	0.853306	0.156525	19.3054	0.870489	0.117698	19.3054	0.865734	0.19442	19.3054	0.853819	0.177209	19.3054	0.874239	0.132471	19.3054	0.863767	0.149661	19.3054	0.881842	0.175331	19.3054	0.875508	0.154743	19.3054	0.861353	0.186405
13	20.8313	0.883667	0.185426	20.8313	0.862835	0.16699	20.8313	0.866515	0.181629	20.8313	0.8715	0.149157	20.8313	0.878137	0.110994	20.8313	0.872361	0.188487	20.8313	0.87445	0.132198	20.8313	0.900509	0.116868	20.8313	0.87817	0.131059	20.8313	0.889204	0.170502	20.8313	0.888124	0.144517	20.8313	0.872521	0.181246
14	22.3572	0.900881	0.176972	22.3572	0.882856	0.159974	22.3572	0.874504	0.176049	22.3572	0.887859	0.139938	22.3572	0.884878	0.103785	22.3572	0.884886	0.183856	22.3572	0.890481	0.106097	22.3572	0.910245	0.108605	22.3572	0.899398	0.117987	22.3572	0.905163	0.167234	22.3572	0.90281	0.132978	22.3572	0.89106	0.172133
15	23.8831	0.914141	0.16365	23.8831	0.898742	0.155395	23.8831	0.893816	0.171376	23.8831	0.90208	0.13579	23.8831	0.897324	0.097712	23.8831	0.894593	0.177835	23.8831	0.908645	0.0913691	23.8831	0.919941	0.0940417	23.8831	0.917177	0.111068	23.8831	0.914035	0.166205	23.8831	0.916348	0.120394	23.8831	0.909323	0.163851
16	25.4089	0.924601	0.163302	25.4089	0.914764	0.121748	25.4089	0.90651	0.166463	25.4089	0.913902	0.13273	25.4089	0.911726	0.0940207	25.4089	0.901775	0.174515	25.4089	0.919919	0.0680426	25.4089	0.940215	0.0766642	25.4089	0.926884	0.105923	25.4089	0.919173	0.165137	25.4089	0.927628	0.115787	25.4089	0.919904	0.15633
17	26.9348	0.933368	0.163007	26.9348	0.92802	0.0917999	26.9348	0.906042	0.162507	26.9348	0.91499	0.13003	26.9348	0.919288	0.0897827	26.9348	0.910869	0.173069	26.9348	0.914012	0.062438	26.9348	0.944039	0.0709043	26.9348	0.934842	0.105188	26.9348	0.92406	0.164067	26.9348	0.938927	0.112924	26.9348	0.92605	0.15259
18	28.4607	0.937325	0.162835	28.4607	0.931618	0.0817788	28.4607	0.913834	0.162046	28.4607	0.91939	0.128889	28.4607	0.927939	0.085878	28.4607	0.915738	0.168468	28.4607	0.915473	0.0602914	28.4607	0.949298	0.070189	28.4607	0.942448	0.0927277	28.4607	0.925948	0.163784	28.4607	0.943215	0.112573	28.4607	0.929077	0.151008
19	29.9866	0.943151	0.158168	29.9866	0.926143	0.0745825	29.9866	0.920815	0.16183	29.9866	0.924478	0.128298	29.9866	0.932492	0.081791	29.9866	0.924086	0.166258	29.9866	0.921518	0.0582395	29.9866	0.95153	0.0683194	29.9866	0.949255	0.0866311	29.9866	0.929071	0.163313	29.9866	0.945055	0.111066	29.9866	0.930047	0.150133
20	31.5125	0.944248	0.158085	31.5125	0.93295	0.0626039	31.5125	0.927535	0.157892	31.5125	0.930407	0.125902	31.5125	0.933284	0.0801174	31.5125	0.924739	0.165834	31.5125	0.924814	0.0576755	31.5125	0.952357	0.0679174	31.5125	0.950191	0.0859142	31.5125	0.933453	0.162545	31.5125	0.946577	0.110584	31.5125	0.929789	0.149846
21	33.0383	0.945673	0.157118	33.0383	0.934752	0.0593994	33.0383	0.930611	0.15773	33.0383	0.933691	0.125389	33.0383	0.941035	0.0731517	33.0383	0.925476	0.165542	33.0383	0.920752	0.0578264	33.0383	0.953687	0.0673394	33.0383	0.951606	0.0854577	33.0383	0.934663	0.162398	33.0383	0.951349	0.110361	33.0383	0.933733	0.149169
22	34.5642	0.946795	0.157048	34.5642	0.941746	0.050799	34.5642	0.935018	0.157707	34.5642	0.935563	0.124364	34.5642	0.944727	0.0715976	34.5642	0.92999	0.164701	34.5642	0.924062	0.0492523	34.5642	0.954641	0.0670702	34.5642	0.952766	0.0842895	34.5642	0.935471	0.162314	34.5642	0.950812	0.110417	34.5642	0.936794	0.148821
23	36.0901	0.94773	0.155077	36.0901	0.945709	0.0492134	36.0901	0.943041	0.155391	36.0901	0.945822	0.116478	36.0901	0.947401	0.0710896	36.0901	0.93562	0.164401	36.0901	0.932708	0.0435569	36.0901	0.955537	0.0665305	36.0901	0.957408	0.0792868	36.0901	0.936595	0.162168	36.0901	0.952883	0.109523	36.0901	0.941227	0.14884
24	37.616	0.94837	0.154471	37.616	0.952282	0.0474034	37.616	0.9499	0.14995	37.616	0.95459	0.0966127	37.616	0.952494	0.069832	37.616	0.939066	0.164261	37.616	0.938281	0.0425507	37.616	0.956795	0.0659064	37.616	0.958377	0.0768667	37.616	0.937755	0.161772	37.616	0.959597	0.0999749	37.616	0.943557	0.148818
25	39.1418	0.950024	0.152058	39.1418	0.956441	0.0442594	39.1418	0.955657	0.147178	39.1418	0.959237	0.0800954	39.1418	0.954651	0.0677873	39.1418	0.942197	0.163951	39.1418	0.944516	0.0408673	39.1418	0.95798	0.065382	39.1418	0.959314	0.0767624	39.1418	0.938557	0.161486	39.1418	0.963806	0.0936661	39.1418	0.943727	0.148729
26	40.6677	0.952635	0.150154	40.6677	0.960443	0.0360045	40.6677	0.958131	0.145977	40.6677	0.961753	0.0641111	40.6677	0.955995	0.0675403	40.6677	0.945817	0.163662	40.6677	0.951113	0.0400531	40.6677	0.959157	0.0640424	40.6677	0.960601	0.0735332	40.6677	0.9388	0.161425	40.6677	0.965304	0.088321	40.6677	0.949085	0.148648
27	42.1936	0.95432	0.14835	42.1936	0.963972	0.0293525	42.1936	0.959805	0.143046	42.1936	0.963883	0.0526844	42.1936	0.962407	0.0672992	42.1936	0.950567	0.16357	42.1936	0.95736	0.0386288	42.1936	0.960204	0.0637187	42.1936	0.961086	0.0719037	42.1936	0.940014	0.160986	42.1936	0.966315	0.0870907	42.1936	0.950971	0.1486
28	43.7195	0.955415	0.148271	43.7195	0.965312	0.0273699	43.7195	0.961192	0.139637	43.7195	0.966007	0.0474445	43.7195	0.963453	0.0647911	43.7195	0.954182	0.161898	43.7195	0.96233	0.0365435	43.7195	0.961785	0.0619345	43.7195	0.962478	0.0717125	43.7195	0.941706	0.16091	43.7195	0.967364	0.0810262	43.7195	0.9537	0.148563
29	45.2454	0.956896	0.148152	45.2454	0.966239	0.0267269	45.2454	0.961944	0.139505	45.2454	0.967499	0.0441884	45.2454	0.965269	0.064635	45.2454	0.958009	0.159005	45.2454	0.968738	0.0277376	45.2454	0.96271	0.061511	45.2454	0.963026	0.0716467	45.2454	0.943919	0.160571	45.2454	0.96834	0.0798918	45.2454	0.957567	0.148499
30	46.7712	0.957725	0.145934	46.7712	0.967236	0.0264102	46.7712	0.962703	0.138013	46.7712	0.969176	0.0409457	46.7712	0.968619	0.0516888	46.7712	0.959777	0.157657	46.7712	0.970755	0.026481	46.7712	0.963306	0.0613229	46.7712	0.964482	0.0697582	46.7712	0.945766	0.160476	46.7712	0.969282	0.0777993	46.7712	0.962989	0.148396
31	48.2971	0.958648	0.145238	48.2971	0.968082	0.025738	48.2971	0.963595	0.135748	48.2971	0.971438	0.0362434	48.2971	0.970327	0.0453985	48.2971	0.961391	0.157094	48.2971	0.971063	0.0258071	48.2971	0.964665	0.0607545	48.2971	0.965518	0.0679805	48.2971	0.947186	0.160347	48.2971	0.970027	0.0777337	48.2971	0.963935	0.148341
32	49.823	0.959606	0.144335	49.823	0.969057	0.0254196	49.823	0.964574	0.134142	49.823	0.972097	0.0327213	49.823	0.971126	0.0452154	49.823	0.963091	0.157017	49.823	0.971908	0.0251661	49.823	0.966021	0.0605041	49.823	0.966543	0.0660598	49.823	0.948406	0.160238	49.823	0.970785	0.0767839	49.823	0.964972	0.148379

## Sheet: Sup Fig. 2e-f
	camera_scan_coverage	camera_ssim	camera_mse	cameraman_scan_coverage	cameraman_ssim	cameraman_mse	clock_scan_coverage	clock_ssim	clock_mse	combined_scan_coverage	combined_ssim	combined_mse	female_scan_coverage	female_ssim	female_mse	house_scan_coverage	house_ssim	house_mse	jellybeans_scan_coverage	jellybeans_ssim	jellybeans_mse	lake_scan_coverage	lake_ssim	lake_mse	male_scan_coverage	male_ssim	male_mse	mandrill_scan_coverage	mandrill_ssim	mandrill_mse	peppers_scan_coverage	peppers_ssim	peppers_mse	plane_scan_coverage	plane_ssim	plane_mse
0	2.04167	0.751199	0.422067	2.04167	0.755503	0.39411	2.04167	0.759909	0.375116	2.04167	0.756396	0.376922	2.04167	0.756071	0.376875	2.04167	0.752801	0.405365	2.04167	0.75828	0.390384	2.04167	0.759489	0.387347	2.04167	0.757428	0.381445	2.04167	0.75522	0.387815	2.04167	0.759577	0.397391	2.04167	0.760163	0.377189
1	3.08333	0.777826	0.36882	3.08333	0.776157	0.350838	3.08333	0.781564	0.335302	3.08333	0.774648	0.337246	3.08333	0.776534	0.337665	3.08333	0.776038	0.360776	3.08333	0.780556	0.347364	3.08333	0.780747	0.340592	3.08333	0.779061	0.343667	3.08333	0.777466	0.341647	3.08333	0.780178	0.353842	3.08333	0.783982	0.337795
2	4.125	0.797371	0.332196	4.125	0.792778	0.320296	4.125	0.796441	0.307933	4.125	0.789065	0.307662	4.125	0.790495	0.309198	4.125	0.794274	0.327595	4.125	0.796648	0.321185	4.125	0.795138	0.314741	4.125	0.796642	0.314807	4.125	0.795194	0.314137	4.125	0.7958	0.326389	4.125	0.800598	0.311071
3	5.16667	0.814449	0.301226	5.16667	0.805216	0.295703	5.16667	0.808292	0.285837	5.16667	0.801202	0.287101	5.16667	0.803247	0.287301	5.16667	0.810147	0.298407	5.16667	0.811133	0.294655	5.16667	0.807029	0.292247	5.16667	0.808985	0.293024	5.16667	0.810406	0.29227	5.16667	0.80811	0.303868	5.16667	0.812674	0.288782
4	6.20833	0.82623	0.27971	6.20833	0.815167	0.27314	6.20833	0.818043	0.270619	6.20833	0.812766	0.267131	6.20833	0.814292	0.266214	6.20833	0.821235	0.279069	6.20833	0.822827	0.27445	6.20833	0.817395	0.272155	6.20833	0.822103	0.272794	6.20833	0.821634	0.270896	6.20833	0.818874	0.281554	6.20833	0.822391	0.267554
5	7.25	0.835494	0.259269	7.25	0.826082	0.254211	7.25	0.829822	0.255096	7.25	0.822171	0.24929	7.25	0.824163	0.248471	7.25	0.830679	0.261767	7.25	0.832914	0.256266	7.25	0.826677	0.256246	7.25	0.83132	0.256821	7.25	0.832581	0.256985	7.25	0.828549	0.262384	7.25	0.831511	0.249346
6	8.29167	0.845887	0.241679	8.29167	0.833814	0.236405	8.29167	0.842843	0.241365	8.29167	0.832031	0.231901	8.29167	0.833555	0.231372	8.29167	0.838238	0.247258	8.29167	0.840158	0.240118	8.29167	0.835043	0.240494	8.29167	0.842227	0.241981	8.29167	0.844047	0.237892	8.29167	0.838611	0.244742	8.29167	0.840327	0.232929
7	9.33333	0.854976	0.223864	9.33333	0.842109	0.219811	9.33333	0.85576	0.225062	9.33333	0.841557	0.215899	9.33333	0.844373	0.212914	9.33333	0.845547	0.231984	9.33333	0.849137	0.223882	9.33333	0.844099	0.223969	9.33333	0.852293	0.22715	9.33333	0.854902	0.222202	9.33333	0.847244	0.228657	9.33333	0.848936	0.217587
8	10.375	0.863305	0.209106	10.375	0.84993	0.206756	10.375	0.866037	0.217233	10.375	0.850331	0.201655	10.375	0.85488	0.199016	10.375	0.852339	0.214175	10.375	0.855761	0.21278	10.375	0.852295	0.207396	10.375	0.862901	0.212112	10.375	0.86504	0.205628	10.375	0.857994	0.213401	10.375	0.85837	0.203482
9	11.4167	0.869884	0.197833	11.4167	0.859258	0.190378	11.4167	0.876201	0.21016	11.4167	0.85899	0.185173	11.4167	0.860678	0.190434	11.4167	0.861482	0.199904	11.4167	0.86374	0.197593	11.4167	0.861827	0.191442	11.4167	0.873077	0.198063	11.4167	0.874407	0.191297	11.4167	0.862339	0.206644	11.4167	0.869004	0.190638
10	12.4583	0.877609	0.18599	12.4583	0.868281	0.176442	12.4583	0.886397	0.20414	12.4583	0.868001	0.172733	12.4583	0.871236	0.176512	12.4583	0.867492	0.191464	12.4583	0.870502	0.185701	12.4583	0.87165	0.177235	12.4583	0.880688	0.188783	12.4583	0.883423	0.177582	12.4583	0.871007	0.19319	12.4583	0.879739	0.178676
11	13.5	0.885847	0.176019	13.5	0.878092	0.162932	13.5	0.894803	0.199039	13.5	0.876676	0.160195	13.5	0.882776	0.166338	13.5	0.876739	0.175097	13.5	0.877666	0.177623	13.5	0.87354	0.174005	13.5	0.886109	0.185545	13.5	0.892622	0.166282	13.5	0.878639	0.179224	13.5	0.888343	0.170471
12	14.5417	0.894403	0.164996	14.5417	0.888234	0.1519	14.5417	0.902833	0.19469	14.5417	0.884118	0.149629	14.5417	0.888442	0.160956	14.5417	0.888437	0.156188	14.5417	0.887421	0.165257	14.5417	0.874078	0.173143	14.5417	0.890962	0.18326	14.5417	0.902337	0.157214	14.5417	0.887914	0.167905	14.5417	0.89715	0.161829
13	15.5833	0.901371	0.155659	15.5833	0.896402	0.141771	15.5833	0.909578	0.190544	15.5833	0.891486	0.137957	15.5833	0.889298	0.158516	15.5833	0.89766	0.144413	15.5833	0.89648	0.153027	15.5833	0.874205	0.173103	15.5833	0.895874	0.180632	15.5833	0.911078	0.147034	15.5833	0.896531	0.157282	15.5833	0.905298	0.153895
14	16.625	0.909151	0.14523	16.625	0.905318	0.129848	16.625	0.9163	0.186302	16.625	0.901194	0.128961	16.625	0.889332	0.158376	16.625	0.905922	0.136793	16.625	0.905047	0.143369	16.625	0.874716	0.172974	16.625	0.898789	0.179098	16.625	0.91839	0.138294	16.625	0.902796	0.151013	16.625	0.913154	0.146102
15	17.6667	0.916521	0.134304	17.6667	0.914575	0.11912	17.6667	0.922668	0.181991	17.6667	0.908361	0.124716	17.6667	0.889516	0.158272	17.6667	0.913676	0.130135	17.6667	0.914038	0.134112	17.6667	0.87784	0.172416	17.6667	0.900782	0.177933	17.6667	0.919363	0.136766	17.6667	0.908874	0.145187	17.6667	0.921095	0.138857
16	18.7083	0.923364	0.122962	18.7083	0.922669	0.110524	18.7083	0.928656	0.178079	18.7083	0.913185	0.12223	18.7083	0.889623	0.158178	18.7083	0.921852	0.124618	18.7083	0.919318	0.12857	18.7083	0.884468	0.166833	18.7083	0.902374	0.176953	18.7083	0.919706	0.136252	18.7083	0.911536	0.143271	18.7083	0.928201	0.131059
17	19.75	0.929447	0.112312	19.75	0.930104	0.102393	19.75	0.934631	0.17412	19.75	0.919266	0.115745	19.75	0.889712	0.15809	19.75	0.928641	0.120184	19.75	0.925809	0.124665	19.75	0.885406	0.16595	19.75	0.903891	0.175869	19.75	0.919987	0.136098	19.75	0.913564	0.141665	19.75	0.935498	0.123053
18	20.7917	0.935892	0.102321	20.7917	0.937339	0.0939993	20.7917	0.93978	0.171033	20.7917	0.924254	0.11297	20.7917	0.889761	0.157997	20.7917	0.93577	0.115558	20.7917	0.930373	0.121626	20.7917	0.88882	0.163908	20.7917	0.90431	0.175674	20.7917	0.920048	0.136071	20.7917	0.914646	0.141094	20.7917	0.94198	0.115291
19	21.8333	0.938613	0.0965369	21.8333	0.944404	0.0854943	21.8333	0.94506	0.166864	21.8333	0.929913	0.10924	21.8333	0.889948	0.157943	21.8333	0.94193	0.111219	21.8333	0.934422	0.11902	21.8333	0.892987	0.161121	21.8333	0.904437	0.175593	21.8333	0.92018	0.136027	21.8333	0.917204	0.139979	21.8333	0.948184	0.105953
20	22.875	0.938861	0.0958668	22.875	0.950666	0.0775577	22.875	0.949897	0.162939	22.875	0.935044	0.105347	22.875	0.890247	0.157724	22.875	0.948533	0.106742	22.875	0.939589	0.115712	22.875	0.893102	0.16088	22.875	0.904475	0.175553	22.875	0.920321	0.136016	22.875	0.917342	0.139792	22.875	0.954089	0.0983354
21	23.9167	0.939547	0.0952876	23.9167	0.95585	0.0705031	23.9167	0.954293	0.159283	23.9167	0.937261	0.103406	23.9167	0.890672	0.157513	23.9167	0.954682	0.101481	23.9167	0.944845	0.111896	23.9167	0.89351	0.160452	23.9167	0.904552	0.175398	23.9167	0.920392	0.136015	23.9167	0.917638	0.139576	23.9167	0.959947	0.0903163
22	24.9583	0.939648	0.0952373	24.9583	0.961621	0.0626351	24.9583	0.958476	0.15514	24.9583	0.937814	0.102656	24.9583	0.891433	0.157001	24.9583	0.960156	0.0968592	24.9583	0.949313	0.108725	24.9583	0.89523	0.159267	24.9583	0.904563	0.175384	24.9583	0.920449	0.13594	24.9583	0.919581	0.138652	24.9583	0.96552	0.0807796
23	26	0.939743	0.0951689	26	0.966741	0.0544837	26	0.962529	0.150907	26	0.938181	0.102401	26	0.892025	0.156779	26	0.965453	0.0911234	26	0.951238	0.107278	26	0.900155	0.155213	26	0.904606	0.175304	26	0.920555	0.135902	26	0.919938	0.13849	26	0.970345	0.0721031
24	27.0417	0.939859	0.095104	27.0417	0.971645	0.0459933	27.0417	0.967226	0.144147	27.0417	0.938282	0.102361	27.0417	0.893086	0.156332	27.0417	0.970417	0.0860664	27.0417	0.953796	0.105433	27.0417	0.908129	0.149162	27.0417	0.904621	0.175267	27.0417	0.920752	0.135809	27.0417	0.920771	0.138146	27.0417	0.975281	0.0629991
25	28.0833	0.939968	0.0952582	28.0833	0.973214	0.0432196	28.0833	0.9718	0.136832	28.0833	0.938345	0.10234	28.0833	0.894355	0.155804	28.0833	0.975195	0.0809773	28.0833	0.956366	0.103311	28.0833	0.912645	0.145352	28.0833	0.90512	0.175033	28.0833	0.92109	0.135691	28.0833	0.923104	0.137169	28.0833	0.979163	0.0550972
26	29.125	0.94017	0.0952392	29.125	0.973314	0.0430535	29.125	0.976507	0.127895	29.125	0.938402	0.102319	29.125	0.895665	0.155116	29.125	0.979795	0.0768854	29.125	0.961014	0.09996	29.125	0.913026	0.144629	29.125	0.906208	0.174368	29.125	0.921657	0.135449	29.125	0.924498	0.13637	29.125	0.982405	0.0474661
27	30.1667	0.940398	0.0952215	30.1667	0.973405	0.0430264	30.1667	0.980277	0.120622	30.1667	0.938441	0.102306	30.1667	0.897309	0.154315	30.1667	0.984277	0.073961	30.1667	0.963483	0.0977716	30.1667	0.913106	0.144551	30.1667	0.907283	0.173812	30.1667	0.922356	0.135164	30.1667	0.924719	0.136195	30.1667	0.985043	0.0416937
28	31.2083	0.940553	0.0951978	31.2083	0.973414	0.0430119	31.2083	0.983366	0.114227	31.2083	0.938554	0.102242	31.2083	0.898813	0.153649	31.2083	0.985369	0.0730047	31.2083	0.963928	0.0971502	31.2083	0.913156	0.144488	31.2083	0.908174	0.171571	31.2083	0.923145	0.134796	31.2083	0.924788	0.136129	31.2083	0.985379	0.0405232
29	32.25	0.940813	0.0951453	32.25	0.973584	0.0429906	32.25	0.985266	0.110208	32.25	0.938731	0.102065	32.25	0.900762	0.152837	32.25	0.985633	0.0725277	32.25	0.964846	0.0966073	32.25	0.913176	0.144444	32.25	0.908329	0.171435	32.25	0.923974	0.134412	32.25	0.925265	0.13573	32.25	0.985438	0.0403802
30	33.2917	0.941079	0.0950322	33.2917	0.973658	0.0429842	33.2917	0.987275	0.105695	33.2917	0.938789	0.102062	33.2917	0.902855	0.151943	33.2917	0.985693	0.0724501	33.2917	0.967298	0.0943339	33.2917	0.913198	0.144386	33.2917	0.90841	0.17136	33.2917	0.925014	0.133859	33.2917	0.925338	0.135684	33.2917	0.985505	0.0403174
31	34.3333	0.941343	0.0949379	34.3333	0.973701	0.0429745	34.3333	0.98888	0.102883	34.3333	0.938914	0.101987	34.3333	0.90492	0.151157	34.3333	0.985781	0.0723674	34.3333	0.96851	0.0933393	34.3333	0.913323	0.14432	34.3333	0.908497	0.171299	34.3333	0.926467	0.133183	34.3333	0.92542	0.135618	34.3333	0.985518	0.0403044
32	35.375	0.941895	0.0947234	35.375	0.973806	0.0429573	35.375	0.990057	0.101166	35.375	0.939144	0.101873	35.375	0.90654	0.150599	35.375	0.985877	0.0723471	35.375	0.968959	0.0928251	35.375	0.913383	0.144277	35.375	0.908585	0.171187	35.375	0.927855	0.132536	35.375	0.92555	0.135567	35.375	0.985611	0.0402916
33	36.4167	0.942593	0.0942902	36.4167	0.974165	0.0427799	36.4167	0.990766	0.0996436	36.4167	0.939371	0.101758	36.4167	0.908076	0.14999	36.4167	0.985942	0.0723086	36.4167	0.970016	0.09197	36.4167	0.913676	0.144097	36.4167	0.91047	0.169577	36.4167	0.929477	0.131825	36.4167	0.925927	0.135398	36.4167	0.985659	0.0402149
34	37.4583	0.94374	0.0936824	37.4583	0.974362	0.0427422	37.4583	0.991229	0.0987023	37.4583	0.940072	0.10141	37.4583	0.909834	0.149187	37.4583	0.986008	0.072246	37.4583	0.971794	0.0902046	37.4583	0.914656	0.143553	37.4583	0.912573	0.16815	37.4583	0.931237	0.131092	37.4583	0.927293	0.13476	37.4583	0.985969	0.0400295
35	38.5	0.945204	0.0927187	38.5	0.974719	0.0426906	38.5	0.991594	0.0979655	38.5	0.94111	0.100783	38.5	0.911978	0.148057	38.5	0.986108	0.0717563	38.5	0.973587	0.0879919	38.5	0.916708	0.142376	38.5	0.914051	0.167312	38.5	0.932718	0.130563	38.5	0.928701	0.133995	38.5	0.986014	0.0400178
36	39.5417	0.94603	0.0921949	39.5417	0.974908	0.0426677	39.5417	0.991859	0.0972799	39.5417	0.94198	0.100185	39.5417	0.914095	0.146918	39.5417	0.986178	0.0717233	39.5417	0.975605	0.0854773	39.5417	0.920687	0.139806	39.5417	0.915045	0.16658	39.5417	0.933945	0.130061	39.5417	0.929815	0.133126	39.5417	0.986056	0.0400121

## Sheet: Sup Fig. 5a
	female_intensities	female_counts	house_intensities	house_counts	jellybeans_intensities	jellybeans_counts	mandrill_intensities	mandrill_counts	lake_intensities	lake_counts	peppers_intensities	peppers_counts	male_intensities	male_counts	camera_intensities	camera_counts	clock_intensities	clock_counts	plane_intensities	plane_counts	cameraman_intensities	cameraman_counts	phantom_intensities	phantom_counts	flakes_intensities	flakes_counts
0	0.005	192	0.005	8	0.005	12	0.005	1	0.005	9	0.005	23	0.005	3056	0.005	877	0.005	33	0.005	1	0.005	1904	0.005	89	0.005	155499
1	0.015	395	0.015	9	0.015	32	0.015	4	0.015	12	0.015	102	0.015	1925	0.015	1302	0.015	78	0.015	1	0.015	2434	0.015	3592	0.015	9718
2	0.025	525	0.025	8	0.025	60	0.025	10	0.025	17	0.025	250	0.025	1562	0.025	546	0.025	108	0.025	2	0.025	4670	0.025	5544	0.025	5422
3	0.035	931	0.035	12	0.035	108	0.035	8	0.035	66	0.035	444	0.035	1642	0.035	485	0.035	188	0.035	84	0.035	2306	0.035	364	0.035	4637
4	0.045	904	0.045	17	0.045	246	0.045	20	0.045	73	0.045	701	0.045	852	0.045	483	0.045	318	0.045	97	0.045	919	0.045	1	0.045	3335
5	0.055	1135	0.055	11	0.055	177	0.055	28	0.055	124	0.055	408	0.055	705	0.055	509	0.055	382	0.055	68	0.055	309	0.055	0	0.055	2922
6	0.065	1900	0.065	27	0.065	314	0.065	32	0.065	230	0.065	439	0.065	917	0.065	738	0.065	417	0.065	3	0.065	320	0.065	0	0.065	2512
7	0.075	1297	0.075	46	0.075	366	0.075	36	0.075	454	0.075	496	0.075	521	0.075	1102	0.075	567	0.075	0	0.075	195	0.075	0	0.075	2465
8	0.085	1417	0.085	109	0.085	266	0.085	65	0.085	453	0.085	561	0.085	506	0.085	2058	0.085	328	0.085	0	0.085	308	0.085	0	0.085	2217
9	0.095	1359	0.095	113	0.095	292	0.095	60	0.095	585	0.095	351	0.095	769	0.095	2961	0.095	288	0.095	0	0.095	167	0.095	0	0.095	1966
10	0.105	2262	0.105	136	0.105	236	0.105	73	0.105	1076	0.105	346	0.105	543	0.105	2951	0.105	235	0.105	0	0.105	274	0.105	2	0.105	1777
11	0.115	1583	0.115	153	0.115	111	0.115	91	0.115	871	0.115	348	0.115	523	0.115	1470	0.115	216	0.115	0	0.115	190	0.115	16	0.115	1736
12	0.125	1659	0.125	155	0.125	195	0.125	91	0.125	1051	0.125	484	0.125	767	0.125	845	0.125	187	0.125	0	0.125	198	0.125	6	0.125	1692
13	0.135	2692	0.135	315	0.135	225	0.135	95	0.135	1250	0.135	265	0.135	526	0.135	526	0.135	175	0.135	0	0.135	264	0.135	0	0.135	1726
14	0.145	1672	0.145	250	0.145	159	0.145	125	0.145	2229	0.145	237	0.145	537	0.145	351	0.145	291	0.145	1	0.145	186	0.145	0	0.145	1805
15	0.155	1912	0.155	215	0.155	145	0.155	171	0.155	1537	0.155	212	0.155	777	0.155	286	0.155	212	0.155	3	0.155	199	0.155	0	0.155	1938
16	0.165	1889	0.165	232	0.165	122	0.165	138	0.165	1528	0.165	331	0.165	558	0.165	290	0.165	206	0.165	9	0.165	142	0.165	0	0.165	1824
17	0.175	3090	0.175	404	0.175	60	0.175	161	0.175	2162	0.175	204	0.175	548	0.175	271	0.175	209	0.175	5	0.175	198	0.175	0	0.175	1575
18	0.185	2449	0.185	261	0.185	130	0.185	176	0.185	1257	0.185	195	0.185	840	0.185	234	0.185	241	0.185	13	0.185	114	0.185	0	0.185	1542
19	0.195	2477	0.195	283	0.195	95	0.195	241	0.195	1108	0.195	270	0.195	543	0.195	188	0.195	251	0.195	10	0.195	200	0.195	13	0.195	1324
20	0.205	3287	0.205	349	0.205	123	0.205	227	0.205	1006	0.205	445	0.205	576	0.205	157	0.205	204	0.205	24	0.205	155	0.205	951	0.205	1454
21	0.215	1784	0.215	622	0.215	115	0.215	268	0.215	1366	0.215	363	0.215	771	0.215	137	0.215	336	0.215	21	0.215	220	0.215	3708	0.215	1617
22	0.225	1751	0.225	467	0.225	110	0.225	283	0.225	811	0.225	427	0.225	552	0.225	148	0.225	248	0.225	25	0.225	160	0.225	676	0.225	1624
23	0.235	1440	0.235	582	0.235	49	0.235	308	0.235	792	0.235	426	0.235	514	0.235	115	0.235	266	0.235	18	0.235	230	0.235	3	0.235	1285
24	0.245	1216	0.245	721	0.245	125	0.245	343	0.245	754	0.245	466	0.245	541	0.245	152	0.245	238	0.245	16	0.245	128	0.245	0	0.245	974
25	0.255	565	0.255	768	0.255	141	0.255	362	0.255	1004	0.255	625	0.255	911	0.255	134	0.255	248	0.255	40	0.255	105	0.255	0	0.255	871
26	0.265	547	0.265	1146	0.265	126	0.265	383	0.265	605	0.265	494	0.265	615	0.265	119	0.265	238	0.265	32	0.265	155	0.265	0	0.265	683
27	0.275	869	0.275	635	0.275	144	0.275	372	0.275	636	0.275	476	0.275	636	0.275	105	0.275	269	0.275	46	0.275	119	0.275	0	0.275	614
28	0.285	615	0.285	648	0.285	159	0.285	401	0.285	858	0.285	474	0.285	882	0.285	124	0.285	431	0.285	25	0.285	136	0.285	0	0.285	600
29	0.295	662	0.295	621	0.295	85	0.295	419	0.295	563	0.295	681	0.295	619	0.295	110	0.295	312	0.295	53	0.295	102	0.295	11	0.295	588
30	0.305	730	0.305	891	0.305	180	0.305	439	0.305	553	0.305	466	0.305	600	0.305	128	0.305	310	0.305	41	0.305	161	0.305	290	0.305	616
31	0.315	1041	0.315	435	0.315	222	0.315	455	0.315	446	0.315	488	0.315	896	0.315	121	0.315	337	0.315	36	0.315	137	0.315	382	0.315	599
32	0.325	663	0.325	346	0.325	235	0.325	476	0.325	757	0.325	473	0.325	573	0.325	105	0.325	338	0.325	32	0.325	201	0.325	18	0.325	574
33	0.335	715	0.335	368	0.335	285	0.335	807	0.335	426	0.335	956	0.335	545	0.335	120	0.335	361	0.335	47	0.335	180	0.335	0	0.335	517
34	0.345	1025	0.345	640	0.345	318	0.345	607	0.345	432	0.345	792	0.345	823	0.345	92	0.345	354	0.345	25	0.345	263	0.345	0	0.345	537
35	0.355	687	0.355	563	0.355	157	0.355	611	0.355	652	0.355	914	0.355	551	0.355	119	0.355	503	0.355	23	0.355	187	0.355	0	0.355	516
36	0.365	644	0.365	688	0.365	341	0.365	655	0.365	415	0.365	961	0.365	543	0.365	103	0.365	336	0.365	30	0.365	395	0.365	0	0.365	462
37	0.375	1019	0.375	704	0.375	360	0.375	691	0.375	446	0.375	1597	0.375	921	0.375	126	0.375	312	0.375	55	0.375	325	0.375	0	0.375	388
38	0.385	636	0.385	754	0.385	354	0.385	709	0.385	404	0.385	1221	0.385	571	0.385	125	0.385	310	0.385	40	0.385	333	0.385	0	0.385	356
39	0.395	552	0.395	1131	0.395	372	0.395	719	0.395	670	0.395	1208	0.395	592	0.395	135	0.395	288	0.395	27	0.395	613	0.395	1	0.395	342
40	0.405	589	0.405	623	0.405	351	0.405	768	0.405	359	0.405	1213	0.405	1003	0.405	140	0.405	265	0.405	47	0.405	421	0.405	9	0.405	392
41	0.415	810	0.415	587	0.415	180	0.415	806	0.415	385	0.415	2140	0.415	666	0.415	128	0.415	258	0.415	33	0.415	747	0.415	4	0.415	385
42	0.425	575	0.425	653	0.425	331	0.425	776	0.425	552	0.425	1491	0.425	666	0.425	109	0.425	416	0.425	37	0.425	542	0.425	0	0.425	388
43	0.435	555	0.435	1353	0.435	286	0.435	830	0.435	307	0.435	1146	0.435	1053	0.435	121	0.435	254	0.435	54	0.435	888	0.435	0	0.435	347
44	0.445	770	0.445	1509	0.445	264	0.445	848	0.445	324	0.445	911	0.445	797	0.445	139	0.445	275	0.445	94	0.445	579	0.445	0	0.445	372
45	0.455	464	0.455	2330	0.455	222	0.455	820	0.455	370	0.455	1035	0.455	738	0.455	175	0.455	299	0.455	60	0.455	953	0.455	0	0.455	319
46	0.465	446	0.465	2962	0.465	219	0.465	885	0.465	466	0.465	649	0.465	1380	0.465	228	0.465	288	0.465	66	0.465	691	0.465	0	0.465	283
47	0.475	416	0.475	4814	0.475	122	0.475	917	0.475	283	0.475	600	0.475	902	0.475	222	0.475	263	0.475	85	0.475	1070	0.475	0	0.475	292
48	0.485	686	0.485	2791	0.485	232	0.485	971	0.485	287	0.485	564	0.485	960	0.485	285	0.485	280	0.485	126	0.485	784	0.485	0	0.485	255
49	0.495	393	0.495	1976	0.495	213	0.495	1006	0.495	269	0.495	549	0.495	885	0.495	301	0.495	277	0.495	121	0.495	808	0.495	0	0.495	319
50	0.505	380	0.505	1216	0.505	223	0.505	1071	0.505	414	0.505	816	0.505	1246	0.505	391	0.505	455	0.505	144	0.505	1272	0.505	0	0.505	255
51	0.515	496	0.515	866	0.515	214	0.515	1245	0.515	297	0.515	517	0.515	850	0.515	466	0.515	337	0.515	244	0.515	819	0.515	0	0.515	315
52	0.525	318	0.525	769	0.525	108	0.525	1435	0.525	273	0.525	535	0.525	807	0.525	539	0.525	322	0.525	175	0.525	1147	0.525	0	0.525	284
53	0.535	347	0.535	316	0.535	242	0.535	1441	0.535	385	0.535	511	0.535	1163	0.535	715	0.535	321	0.535	230	0.535	732	0.535	0	0.535	301
54	0.545	372	0.545	261	0.545	246	0.545	1469	0.545	285	0.545	753	0.545	830	0.545	847	0.545	310	0.545	231	0.545	1086	0.545	0	0.545	296
55	0.555	591	0.555	215	0.555	245	0.555	1541	0.555	260	0.555	488	0.555	851	0.555	1135	0.555	313	0.555	413	0.555	781	0.555	0	0.555	269
56	0.565	425	0.565	278	0.565	246	0.565	1493	0.565	219	0.565	481	0.565	1398	0.565	1454	0.565	323	0.565	351	0.565	1383	0.565	0	0.565	289
57	0.575	432	0.575	158	0.575	239	0.575	1427	0.575	368	0.575	523	0.575	917	0.575	1642	0.575	450	0.575	385	0.575	1041	0.575	0	0.575	333
58	0.585	611	0.585	170	0.585	163	0.585	1426	0.585	261	0.585	880	0.585	903	0.585	1905	0.585	297	0.585	370	0.585	1736	0.585	0	0.585	365
59	0.595	339	0.595	138	0.595	288	0.595	1352	0.595	302	0.595	647	0.595	1283	0.595	2197	0.595	292	0.595	569	0.595	1083	0.595	0	0.595	370
60	0.605	324	0.605	287	0.605	295	0.605	1315	0.605	492	0.605	685	0.605	786	0.605	2268	0.605	353	0.605	440	0.605	1928	0.605	0	0.605	458
61	0.615	303	0.615	256	0.615	307	0.615	1257	0.615	363	0.615	720	0.615	812	0.615	2261	0.615	315	0.615	449	0.615	1517	0.615	0	0.615	510
62	0.625	382	0.625	298	0.625	245	0.625	1241	0.625	422	0.625	1138	0.625	1234	0.625	2110	0.625	301	0.625	776	0.625	1816	0.625	0	0.625	599
63	0.635	223	0.635	260	0.635	243	0.635	1192	0.635	436	0.635	782	0.635	829	0.635	1697	0.635	298	0.635	546	0.635	3601	0.635	0	0.635	629
64	0.645	222	0.645	173	0.645	133	0.645	1166	0.645	568	0.645	800	0.645	852	0.645	1049	0.645	473	0.645	549	0.645	2291	0.645	0	0.645	664
65	0.655	275	0.655	181	0.655	256	0.655	1106	0.655	403	0.655	811	0.655	1159	0.655	648	0.655	318	0.655	605	0.655	2876	0.655	0	0.655	729
66	0.665	151	0.665	114	0.665	243	0.665	1646	0.665	401	0.665	1239	0.665	786	0.665	429	0.665	286	0.665	899	0.665	1507	0.665	0	0.665	736
67	0.675	98	0.675	83	0.675	260	0.675	1017	0.675	596	0.675	848	0.675	714	0.675	313	0.675	315	0.675	625	0.675	2047	0.675	0	0.675	677
68	0.685	123	0.685	121	0.685	256	0.685	1017	0.685	409	0.685	887	0.685	991	0.685	186	0.685	315	0.685	662	0.685	1300	0.685	0	0.685	649
69	0.695	94	0.695	138	0.695	309	0.695	1011	0.695	535	0.695	880	0.695	630	0.695	160	0.695	347	0.695	660	0.695	1989	0.695	0	0.695	624
70	0.705	92	0.705	83	0.705	152	0.705	984	0.705	738	0.705	1406	0.705	628	0.705	153	0.705	356	0.705	1067	0.705	1382	0.705	0	0.705	558
71	0.715	75	0.715	158	0.715	301	0.715	1018	0.715	1568	0.715	1001	0.715	781	0.715	142	0.715	556	0.715	685	0.715	1813	0.715	0	0.715	517
72	0.725	117	0.725	237	0.725	334	0.725	917	0.725	1136	0.725	1053	0.725	436	0.725	120	0.725	443	0.725	785	0.725	984	0.725	0	0.725	468
73	0.735	96	0.735	179	0.735	390	0.735	919	0.735	1405	0.735	889	0.735	295	0.735	117	0.735	383	0.735	833	0.735	745	0.735	0	0.735	489
74	0.745	61	0.745	419	0.745	463	0.745	975	0.745	1923	0.745	787	0.745	268	0.745	497	0.745	453	0.745	1257	0.745	202	0.745	0	0.745	430
75	0.755	95	0.755	2769	0.755	528	0.755	933	0.755	3217	0.755	1134	0.755	327	0.755	877	0.755	515	0.755	832	0.755	132	0.755	0	0.755	378
76	0.765	53	0.765	9456	0.765	276	0.765	903	0.765	1221	0.765	799	0.765	176	0.765	1647	0.765	513	0.765	792	0.765	144	0.765	0	0.765	347
77	0.775	42	0.775	5788	0.775	494	0.775	966	0.775	900	0.775	895	0.775	175	0.775	2134	0.775	594	0.775	1273	0.775	63	0.775	0	0.775	290
78	0.785	38	0.785	1921	0.785	629	0.785	975	0.785	1082	0.785	842	0.785	246	0.785	2279	0.785	920	0.785	904	0.785	86	0.785	0	0.785	250
79	0.795	79	0.795	469	0.795	772	0.795	967	0.795	694	0.795	1109	0.795	149	0.795	1975	0.795	737	0.795	1036	0.795	54	0.795	0	0.795	212
80	0.805	40	0.805	162	0.805	983	0.805	1004	0.805	760	0.805	795	0.805	151	0.805	1959	0.805	890	0.805	1086	0.805	61	0.805	0	0.805	155
81	0.815	35	0.815	79	0.815	1233	0.815	947	0.815	718	0.815	923	0.815	206	0.815	2462	0.815	1126	0.815	1774	0.815	41	0.815	0	0.815	109
82	0.825	50	0.825	106	0.825	718	0.825	1018	0.825	780	0.825	1005	0.825	159	0.825	1930	0.825	1234	0.825	1312	0.825	51	0.825	0	0.825	70
83	0.835	32	0.835	88	0.835	1806	0.835	1022	0.835	347	0.835	1629	0.835	133	0.835	1614	0.835	1295	0.835	1412	0.835	39	0.835	0	0.835	43
84	0.845	27	0.845	77	0.845	2153	0.845	1044	0.845	429	0.845	894	0.845	229	0.845	691	0.845	1293	0.845	1509	0.845	56	0.845	0	0.845	30
85	0.855	25	0.855	82	0.855	2132	0.855	968	0.855	739	0.855	738	0.855	166	0.855	313	0.855	2066	0.855	2767	0.855	17	0.855	0	0.855	33
86	0.865	34	0.865	111	0.865	2274	0.865	918	0.865	515	0.865	479	0.865	180	0.865	566	0.865	1593	0.865	2025	0.865	38	0.865	0	0.865	20
87	0.875	15	0.875	81	0.875	2626	0.875	770	0.875	480	0.875	598	0.875	272	0.875	87	0.875	1614	0.875	2131	0.875	35	0.875	0	0.875	14
88	0.885	19	0.885	59	0.885	1293	0.885	632	0.885	625	0.885	312	0.885	153	0.885	107	0.885	1898	0.885	3339	0.885	36	0.885	0	0.885	12
89	0.895	32	0.895	58	0.895	2857	0.895	491	0.895	987	0.895	311	0.895	148	0.895	140	0.895	2358	0.895	2136	0.895	41	0.895	0	0.895	5
90	0.905	19	0.905	57	0.905	3970	0.905	380	0.905	711	0.905	276	0.905	113	0.905	118	0.905	3046	0.905	1994	0.905	29	0.905	0	0.905	7
91	0.915	13	0.915	140	0.915	6143	0.915	292	0.915	919	0.915	435	0.915	60	0.915	95	0.915	4002	0.915	2014	0.915	37	0.915	0	0.915	3
92	0.925	13	0.925	118	0.925	6791	0.925	252	0.925	1591	0.925	262	0.925	47	0.925	45	0.925	12342	0.925	2939	0.925	23	0.925	0	0.925	2
93	0.935	16	0.935	181	0.935	6573	0.935	196	0.935	594	0.935	279	0.935	57	0.935	58	0.935	2846	0.935	1858	0.935	54	0.935	0	0.935	0
94	0.945	6	0.945	215	0.945	2194	0.945	154	0.945	205	0.945	308	0.945	19	0.945	39	0.945	923	0.945	1929	0.945	44	0.945	0	0.945	0
95	0.955	4	0.955	397	0.955	1681	0.955	115	0.955	127	0.955	288	0.955	10	0.955	31	0.955	368	0.955	2285	0.955	31	0.955	0	0.955	2
96	0.965	4	0.965	130	0.965	646	0.965	78	0.965	100	0.965	131	0.965	7	0.965	42	0.965	170	0.965	9374	0.965	9	0.965	1	0.965	0
97	0.975	3	0.975	134	0.975	476	0.975	28	0.975	28	0.975	65	0.975	1	0.975	41	0.975	120	0.975	2677	0.975	18	0.975	87	0.975	2
98	0.985	2	0.985	22	0.985	104	0.985	11	0.985	14	0.985	24	0.985	2	0.985	25	0.985	43	0.985	464	0.985	25	0.985	477	0.985	0
99	0.995	1	0.995	21	0.995	11	0.995	3	0.995	4	0.995	10	0.995	2	0.995	24	0.995	54	0.995	48	0.995	9	0.995	139	0.995	1

## Sheet: Sup Fig. 5b
	female_intensity	female_cum_dist	house_intensity	house_cum_dist	jellybeans_intensity	jellybeans_cum_dist	mandrill_intensity	mandrill_cum_dist	lake_intensity	lake_cum_dist	peppers_intensity	peppers_cum_dist	male_intensity	male_cum_dist	camera_intensity	camera_cum_dist	clock_intensity	clock_cum_dist	plane_intensity	plane_cum_dist	cameraman_intensity	cameraman_cum_dist	phantom_intensities	phantom_cum_dist	flakes_intensities	flakes_cum_dist
0	0.00195312	9.15527e-05	0.00195312	1.52588e-05	0.00195312	7.62939e-05	0.00195312	1.52588e-05	0.00195312	6.10352e-05	0.00195312	3.05176e-05	0.00195312	0.0159302	0.00195312	0.000442505	0.00195312	4.57764e-05	0.00195312	1.52588e-05	0.00195312	6.10352e-05	0.00195312	0.000183105	0.00195312	0.571646
1	0.00585938	0.00131226	0.00585938	3.05176e-05	0.00585938	0.000183105	0.00585938	1.52588e-05	0.00585938	7.62939e-05	0.00585938	0.000152588	0.00585938	0.0318146	0.00585938	0.00773621	0.00585938	0.000289917	0.00585938	1.52588e-05	0.00585938	0.0065155	0.00585938	0.00170898	0.00585938	0.625812
2	0.00976562	0.00292969	0.00976562	0.00012207	0.00976562	0.000350952	0.00976562	1.52588e-05	0.00976562	0.000137329	0.00976562	0.000350952	0.00976562	0.0466309	0.00976562	0.0186462	0.00976562	0.00050354	0.00976562	1.52588e-05	0.00976562	0.0290527	0.00976562	0.0125122	0.00976562	0.658312
3	0.0136719	0.00544739	0.0136719	0.000198364	0.0136719	0.000350952	0.0136719	6.10352e-05	0.0136719	0.000244141	0.0136719	0.000900269	0.0136719	0.0616455	0.0136719	0.0275421	0.0136719	0.00100708	0.0136719	3.05176e-05	0.0136719	0.0482635	0.0136719	0.065918	0.0136719	0.674825
4	0.0175781	0.00895691	0.0175781	0.000259399	0.0175781	0.000671387	0.0175781	6.10352e-05	0.0175781	0.000320435	0.0175781	0.00190735	0.0175781	0.076004	0.0175781	0.0326996	0.0175781	0.00169373	0.0175781	3.05176e-05	0.0175781	0.0661926	0.0175781	0.201965	0.0175781	0.687033
5	0.0214844	0.0131989	0.0214844	0.000320435	0.0214844	0.00100708	0.0214844	7.62939e-05	0.0214844	0.000427246	0.0214844	0.00328064	0.0214844	0.0886536	0.0214844	0.0365601	0.0214844	0.00247192	0.0214844	4.57764e-05	0.0214844	0.0884094	0.0214844	0.384338	0.0214844	0.697183
6	0.0253906	0.0169678	0.0253906	0.00038147	0.0253906	0.00158691	0.0253906	0.000137329	0.0253906	0.000579834	0.0253906	0.00572205	0.0253906	0.0998383	0.0253906	0.0397797	0.0253906	0.00247192	0.0253906	6.10352e-05	0.0253906	0.11174	0.0253906	0.518066	0.0253906	0.705625
7	0.0292969	0.0211334	0.0292969	0.00038147	0.0292969	0.00158691	0.0292969	0.000228882	0.0292969	0.000778198	0.0292969	0.00572205	0.0292969	0.108917	0.0292969	0.0424194	0.0292969	0.00334167	0.0292969	0.000213623	0.0292969	0.137451	0.0292969	0.572815	0.0292969	0.713462
8	0.0332031	0.0260162	0.0332031	0.000457764	0.0332031	0.00242615	0.0332031	0.000320435	0.0332031	0.00105286	0.0332031	0.00857544	0.0332031	0.117294	0.0332031	0.0453644	0.0332031	0.00482178	0.0332031	0.000213623	0.0332031	0.157867	0.0332031	0.584167	0.0332031	0.72145
9	0.0371094	0.0260162	0.0371094	0.000564575	0.0371094	0.00323486	0.0371094	0.000320435	0.0371094	0.00105286	0.0371094	0.0124969	0.0371094	0.124893	0.0371094	0.0483398	0.0371094	0.00621033	0.0371094	0.000717163	0.0371094	0.172638	0.0371094	0.585205	0.0371094	0.728675
10	0.0410156	0.0311737	0.0410156	0.000640869	0.0410156	0.00323486	0.0410156	0.000350952	0.0410156	0.00158691	0.0410156	0.0161285	0.0410156	0.124893	0.0410156	0.0510864	0.0410156	0.008255	0.0410156	0.00134277	0.0410156	0.179825	0.0410156	0.585327	0.0410156	0.734604
11	0.0449219	0.0379944	0.0449219	0.000762939	0.0449219	0.00509644	0.0449219	0.000518799	0.0449219	0.00227356	0.0449219	0.0198517	0.0449219	0.13179	0.0449219	0.0541229	0.0449219	0.0110626	0.0449219	0.00209045	0.0449219	0.183807	0.0449219	0.585327	0.0449219	0.740033
12	0.0488281	0.0449677	0.0488281	0.000823975	0.0488281	0.00698853	0.0488281	0.000656128	0.0488281	0.00270081	0.0488281	0.0231934	0.0488281	0.137894	0.0488281	0.0570526	0.0488281	0.0110626	0.0488281	0.00282288	0.0488281	0.186661	0.0488281	0.585327	0.0488281	0.74515
13	0.0527344	0.0523224	0.0527344	0.000915527	0.0527344	0.00968933	0.0527344	0.000808716	0.0527344	0.00344849	0.0527344	0.0261841	0.0527344	0.143799	0.0527344	0.0596619	0.0527344	0.0137787	0.0527344	0.003479	0.0527344	0.18924	0.0527344	0.585327	0.0527344	0.750121
14	0.0566406	0.0622864	0.0566406	0.000991821	0.0566406	0.00968933	0.0566406	0.000808716	0.0566406	0.0045929	0.0566406	0.0294189	0.0566406	0.148651	0.0566406	0.0627899	0.0566406	0.0168915	0.0566406	0.00386047	0.0566406	0.191376	0.0566406	0.585327	0.0566406	0.754929
15	0.0605469	0.072525	0.0605469	0.000991821	0.0605469	0.0122528	0.0605469	0.00108337	0.0605469	0.00610352	0.0605469	0.0294189	0.0605469	0.153564	0.0605469	0.0667572	0.0605469	0.019989	0.0605469	0.00390625	0.0605469	0.193008	0.0605469	0.585327	0.0605469	0.758846
16	0.0644531	0.0821686	0.0644531	0.00119019	0.0644531	0.0144806	0.0644531	0.00128174	0.0644531	0.00810242	0.0644531	0.0328064	0.0644531	0.158279	0.0644531	0.0708466	0.0644531	0.0232544	0.0644531	0.00390625	0.0644531	0.194672	0.0644531	0.585327	0.0644531	0.762912
17	0.0683594	0.0912781	0.0683594	0.00140381	0.0683594	0.0144806	0.0683594	0.00157166	0.0683594	0.00993347	0.0683594	0.0361176	0.0683594	0.162643	0.0683594	0.0757599	0.0683594	0.0266571	0.0683594	0.00390625	0.0683594	0.196259	0.0683594	0.585327	0.0683594	0.767117
18	0.0722656	0.0912781	0.0722656	0.00170898	0.0722656	0.0173798	0.0722656	0.00183105	0.0722656	0.00993347	0.0722656	0.0402222	0.0722656	0.166718	0.0722656	0.081543	0.0722656	0.0266571	0.0722656	0.00390625	0.0722656	0.197723	0.0722656	0.585327	0.0722656	0.771225
19	0.0761719	0.101013	0.0761719	0.00210571	0.0761719	0.0200653	0.0761719	0.00183105	0.0761719	0.0120544	0.0761719	0.0436859	0.0761719	0.170593	0.0761719	0.0885162	0.0761719	0.0292511	0.0761719	0.00390625	0.0761719	0.199234	0.0761719	0.585327	0.0761719	0.775225
20	0.0800781	0.111069	0.0800781	0.00241089	0.0800781	0.0220947	0.0800781	0.00212097	0.0800781	0.0150299	0.0800781	0.0467987	0.0800781	0.17424	0.0800781	0.0974274	0.0800781	0.0319061	0.0800781	0.00390625	0.0800781	0.200974	0.0800781	0.585327	0.0800781	0.779146
21	0.0839844	0.121964	0.0839844	0.00296021	0.0839844	0.0220947	0.0839844	0.00263977	0.0839844	0.0180664	0.0839844	0.0497742	0.0839844	0.17424	0.0839844	0.108917	0.0839844	0.0344849	0.0839844	0.00390625	0.0839844	0.202286	0.0839844	0.585327	0.0839844	0.782642
22	0.0878906	0.13269	0.0878906	0.00376892	0.0878906	0.0241241	0.0878906	0.00311279	0.0878906	0.0219421	0.0878906	0.0522461	0.0878906	0.178314	0.0878906	0.122986	0.0878906	0.036911	0.0878906	0.00390625	0.0878906	0.203934	0.0878906	0.585327	0.0878906	0.786175
23	0.0917969	0.142868	0.0917969	0.00376892	0.0917969	0.0265503	0.0917969	0.00350952	0.0917969	0.026413	0.0917969	0.0522461	0.0917969	0.182114	0.0917969	0.139313	0.0917969	0.0392914	0.0917969	0.00390625	0.0917969	0.205322	0.0917969	0.585327	0.0917969	0.7898
24	0.0957031	0.153427	0.0957031	0.00466919	0.0957031	0.0265503	0.0957031	0.00350952	0.0957031	0.0308685	0.0957031	0.0551453	0.0957031	0.186295	0.0957031	0.156876	0.0957031	0.0392914	0.0957031	0.00390625	0.0957031	0.206482	0.0957031	0.585327	0.0957031	0.792779
25	0.0996094	0.164154	0.0996094	0.00549316	0.0996094	0.0285797	0.0996094	0.00402832	0.0996094	0.0357819	0.0996094	0.0576019	0.0996094	0.190048	0.0996094	0.176956	0.0996094	0.0413055	0.0996094	0.00390625	0.0996094	0.206482	0.0996094	0.585327	0.0996094	0.795704
26	0.103516	0.175568	0.103516	0.00665283	0.103516	0.0304108	0.103516	0.0045929	0.103516	0.0408936	0.103516	0.0603943	0.103516	0.194	0.103516	0.19548	0.103516	0.043045	0.103516	0.00390625	0.103516	0.207993	0.103516	0.585327	0.103516	0.798758
27	0.107422	0.187943	0.107422	0.00756836	0.107422	0.0321808	0.107422	0.00514221	0.107422	0.0408936	0.107422	0.0628815	0.107422	0.198334	0.107422	0.211609	0.107422	0.0448914	0.107422	0.00390625	0.107422	0.209396	0.107422	0.585449	0.107422	0.801517
28	0.111328	0.187943	0.111328	0.00871277	0.111328	0.0321808	0.111328	0.00514221	0.111328	0.047287	0.111328	0.0654144	0.111328	0.202408	0.111328	0.2229	0.111328	0.0465393	0.111328	0.00390625	0.111328	0.210663	0.111328	0.585754	0.111328	0.804333
29	0.115234	0.200241	0.115234	0.00990295	0.115234	0.0338745	0.115234	0.00596619	0.115234	0.0535583	0.115234	0.0681915	0.115234	0.206314	0.115234	0.231232	0.115234	0.0481873	0.115234	0.00390625	0.115234	0.212265	0.115234	0.586182	0.115234	0.807187
30	0.119141	0.212097	0.119141	0.0108643	0.119141	0.0354767	0.119141	0.00653076	0.119141	0.0605774	0.119141	0.0704651	0.119141	0.209991	0.119141	0.238129	0.119141	0.0481873	0.119141	0.00390625	0.119141	0.213562	0.119141	0.586487	0.119141	0.809904
31	0.123047	0.224609	0.123047	0.0108643	0.123047	0.0354767	0.123047	0.00730896	0.123047	0.0682373	0.123047	0.0704651	0.123047	0.209991	0.123047	0.243591	0.123047	0.0496521	0.123047	0.00390625	0.123047	0.215088	0.123047	0.586731	0.123047	0.812767
32	0.126953	0.237411	0.126953	0.0122681	0.126953	0.03685	0.126953	0.00791931	0.126953	0.0766144	0.126953	0.0731812	0.126953	0.214081	0.126953	0.248032	0.126953	0.0510406	0.126953	0.00390625	0.126953	0.216583	0.126953	0.586792	0.126953	0.815542
33	0.130859	0.251083	0.130859	0.0137329	0.130859	0.038269	0.130859	0.00791931	0.130859	0.0854645	0.130859	0.0755768	0.130859	0.218018	0.130859	0.251801	0.130859	0.0524292	0.130859	0.00390625	0.130859	0.218063	0.130859	0.586792	0.130859	0.818125
34	0.134766	0.264603	0.134766	0.0154419	0.134766	0.0402832	0.134766	0.00862122	0.134766	0.0956879	0.134766	0.0775146	0.134766	0.22197	0.134766	0.254883	0.134766	0.0537109	0.134766	0.00390625	0.134766	0.219299	0.134766	0.586792	0.134766	0.821092
35	0.138672	0.278488	0.138672	0.0170746	0.138672	0.0402832	0.138672	0.0093689	0.138672	0.106445	0.138672	0.0796204	0.138672	0.226044	0.138672	0.257645	0.138672	0.0554352	0.138672	0.00390625	0.138672	0.220612	0.138672	0.586792	0.138672	0.823812
36	0.142578	0.290573	0.142578	0.0189667	0.142578	0.0415039	0.142578	0.0101929	0.142578	0.106445	0.142578	0.081665	0.142578	0.230164	0.142578	0.260071	0.142578	0.0554352	0.142578	0.00390625	0.142578	0.221832	0.142578	0.586792	0.142578	0.826617
37	0.146484	0.290573	0.146484	0.0208893	0.146484	0.0427094	0.146484	0.0112762	0.146484	0.117996	0.146484	0.0832367	0.146484	0.234238	0.146484	0.261917	0.146484	0.056839	0.146484	0.00390625	0.146484	0.22345	0.146484	0.586792	0.146484	0.829762
38	0.150391	0.304001	0.150391	0.0208893	0.150391	0.0427094	0.150391	0.0112762	0.150391	0.1297	0.150391	0.085083	0.150391	0.238159	0.150391	0.263565	0.150391	0.0581512	0.150391	0.00392151	0.150391	0.224487	0.150391	0.586792	0.150391	0.832917
39	0.154297	0.318237	0.154297	0.0224304	0.154297	0.0438538	0.154297	0.0126648	0.154297	0.141724	0.154297	0.085083	0.154297	0.242386	0.154297	0.265121	0.154297	0.0596619	0.154297	0.00393677	0.154297	0.225388	0.154297	0.586792	0.154297	0.836058
40	0.158203	0.333176	0.158203	0.0241699	0.158203	0.0449219	0.158203	0.0138855	0.158203	0.153152	0.158203	0.0864716	0.158203	0.246094	0.158203	0.266953	0.158203	0.0613861	0.158203	0.00396729	0.158203	0.226486	0.158203	0.586792	0.158203	0.839163
41	0.162109	0.347794	0.162109	0.0258331	0.162109	0.0458527	0.162109	0.0147858	0.162109	0.165314	0.162109	0.0883789	0.162109	0.25032	0.162109	0.268478	0.162109	0.0629425	0.162109	0.00404358	0.162109	0.227661	0.162109	0.586792	0.162109	0.842213
42	0.166016	0.362	0.166016	0.02771	0.166016	0.0458527	0.166016	0.0159912	0.166016	0.176468	0.166016	0.0899811	0.166016	0.25032	0.166016	0.270447	0.166016	0.0629425	0.166016	0.00410461	0.166016	0.228653	0.166016	0.586792	0.166016	0.845063
43	0.169922	0.376785	0.169922	0.0295868	0.169922	0.0467834	0.169922	0.0159912	0.169922	0.187714	0.169922	0.0915222	0.169922	0.254608	0.169922	0.272186	0.169922	0.0645294	0.169922	0.00415039	0.169922	0.229721	0.169922	0.586792	0.169922	0.847988
44	0.173828	0.39241	0.173828	0.0318298	0.173828	0.047699	0.173828	0.0172424	0.173828	0.198395	0.173828	0.0930176	0.173828	0.258926	0.173828	0.273666	0.173828	0.0661774	0.173828	0.00415039	0.173828	0.230652	0.173828	0.586792	0.173828	0.850483
45	0.177734	0.409149	0.177734	0.0338745	0.177734	0.047699	0.177734	0.0184479	0.177734	0.198395	0.177734	0.094635	0.177734	0.26297	0.177734	0.27536	0.177734	0.0677185	0.177734	0.00418091	0.177734	0.231674	0.177734	0.586792	0.177734	0.853
46	0.181641	0.427704	0.181641	0.0338745	0.181641	0.048645	0.181641	0.0196686	0.181641	0.209457	0.181641	0.0961304	0.181641	0.267303	0.181641	0.276825	0.181641	0.0695648	0.181641	0.00422668	0.181641	0.232437	0.181641	0.586792	0.181641	0.855596
47	0.185547	0.427704	0.185547	0.0357819	0.185547	0.0496826	0.185547	0.0211334	0.185547	0.21933	0.185547	0.0961304	0.185547	0.2715	0.185547	0.278214	0.185547	0.0713959	0.185547	0.00430298	0.185547	0.233414	0.185547	0.586792	0.185547	0.857983
48	0.189453	0.446518	0.189453	0.0378571	0.189453	0.0503845	0.189453	0.0211334	0.189453	0.228638	0.189453	0.0976105	0.189453	0.275787	0.189453	0.279587	0.189453	0.0713959	0.189453	0.00437927	0.189453	0.234543	0.189453	0.586792	0.189453	0.860454
49	0.193359	0.465561	0.193359	0.0397186	0.193359	0.0503845	0.193359	0.0230103	0.193359	0.237381	0.193359	0.0995941	0.193359	0.280167	0.193359	0.280701	0.193359	0.0732574	0.193359	0.00450134	0.193359	0.235565	0.193359	0.586975	0.193359	0.862646
50	0.197266	0.484314	0.197266	0.0421753	0.197266	0.0511322	0.197266	0.0248108	0.197266	0.245544	0.197266	0.10173	0.197266	0.284073	0.197266	0.281723	0.197266	0.0752258	0.197266	0.00453186	0.197266	0.236465	0.197266	0.58728	0.197266	0.864679
51	0.201172	0.502487	0.201172	0.044754	0.201172	0.0522461	0.201172	0.026474	0.201172	0.253326	0.201172	0.103851	0.201172	0.288544	0.201172	0.282669	0.201172	0.0768585	0.201172	0.00474548	0.201172	0.236465	0.201172	0.59137	0.201172	0.866971
52	0.205078	0.520233	0.205078	0.0475006	0.205078	0.0522461	0.205078	0.0282745	0.205078	0.260895	0.205078	0.106293	0.205078	0.292862	0.205078	0.283585	0.205078	0.0783386	0.205078	0.00474548	0.205078	0.237534	0.205078	0.609131	0.205078	0.869371
53	0.208984	0.53447	0.208984	0.050415	0.208984	0.053009	0.208984	0.0282745	0.208984	0.268524	0.208984	0.108521	0.208984	0.292862	0.208984	0.284515	0.208984	0.080246	0.208984	0.00489807	0.208984	0.238831	0.208984	0.665649	0.208984	0.871625
54	0.212891	0.548157	0.212891	0.050415	0.212891	0.0538788	0.212891	0.0302582	0.212891	0.268524	0.212891	0.111206	0.212891	0.297028	0.212891	0.285202	0.212891	0.080246	0.212891	0.00502014	0.212891	0.240051	0.212891	0.762024	0.212891	0.874225
55	0.216797	0.561691	0.216797	0.0536499	0.216797	0.0547638	0.216797	0.0323639	0.216797	0.27475	0.216797	0.111206	0.216797	0.300949	0.216797	0.286087	0.216797	0.082077	0.216797	0.00521851	0.216797	0.241089	0.216797	0.852844	0.216797	0.877017
56	0.220703	0.561691	0.220703	0.0569916	0.220703	0.0547638	0.220703	0.0343781	0.220703	0.281738	0.220703	0.114059	0.220703	0.304626	0.220703	0.286926	0.220703	0.0834656	0.220703	0.00535583	0.220703	0.242188	0.220703	0.897949	0.220703	0.879821
57	0.224609	0.575378	0.224609	0.0602264	0.224609	0.0555725	0.224609	0.0343781	0.224609	0.287933	0.224609	0.117249	0.224609	0.309113	0.224609	0.287888	0.224609	0.0852203	0.224609	0.00544739	0.224609	0.243317	0.224609	0.910583	0.224609	0.882454
58	0.228516	0.588409	0.228516	0.0641174	0.228516	0.0564423	0.228516	0.0366821	0.228516	0.294113	0.228516	0.120575	0.228516	0.313049	0.228516	0.288696	0.228516	0.0872498	0.228516	0.00559998	0.228516	0.244629	0.228516	0.913269	0.228516	0.884983
59	0.232422	0.600662	0.232422	0.0683136	0.232422	0.0564423	0.232422	0.0389252	0.232422	0.30011	0.232422	0.123962	0.232422	0.317062	0.232422	0.289459	0.232422	0.0892639	0.232422	0.00575256	0.232422	0.245956	0.232422	0.91333	0.232422	0.887167
60	0.236328	0.610382	0.236328	0.072998	0.236328	0.0571899	0.236328	0.0413818	0.236328	0.306198	0.236328	0.127075	0.236328	0.320892	0.236328	0.290085	0.236328	0.0892639	0.236328	0.00587463	0.236328	0.247116	0.236328	0.913391	0.236328	0.889246
61	0.240234	0.618317	0.240234	0.0783997	0.240234	0.0578461	0.240234	0.0439758	0.240234	0.312103	0.240234	0.130737	0.240234	0.324783	0.240234	0.290802	0.240234	0.0913086	0.240234	0.00587463	0.240234	0.248138	0.240234	0.913391	0.240234	0.890971
62	0.244141	0.624161	0.244141	0.0783997	0.244141	0.0590973	0.244141	0.0439758	0.244141	0.317703	0.244141	0.134186	0.244141	0.329147	0.244141	0.291855	0.244141	0.0930939	0.244141	0.00602722	0.244141	0.249069	0.244141	0.913391	0.244141	0.892579
63	0.248047	0.628937	0.248047	0.0839996	0.248047	0.0590973	0.248047	0.0466156	0.248047	0.317703	0.248047	0.134186	0.248047	0.329147	0.248047	0.292694	0.248047	0.0949402	0.248047	0.00611877	0.248047	0.250092	0.248047	0.913391	0.248047	0.894108
64	0.251953	0.63324	0.251953	0.0902405	0.251953	0.0601959	0.251953	0.0491486	0.251953	0.322525	0.251953	0.137177	0.251953	0.333954	0.251953	0.29364	0.251953	0.0968018	0.251953	0.00631714	0.251953	0.251038	0.251953	0.913391	0.251953	0.895546
65	0.255859	0.637558	0.255859	0.0957184	0.255859	0.0612488	0.255859	0.0521393	0.255859	0.327805	0.255859	0.140518	0.255859	0.338364	0.255859	0.294403	0.255859	0.0987244	0.255859	0.0065918	0.255859	0.251694	0.255859	0.913391	0.255859	0.897008
66	0.259766	0.637558	0.259766	0.101807	0.259766	0.0612488	0.259766	0.0548096	0.259766	0.333023	0.259766	0.143723	0.259766	0.343048	0.259766	0.295166	0.259766	0.10051	0.259766	0.00672913	0.259766	0.252563	0.259766	0.913391	0.259766	0.898217
67	0.263672	0.641922	0.263672	0.107513	0.263672	0.0622253	0.263672	0.0548096	0.263672	0.337433	0.263672	0.147858	0.263672	0.347488	0.263672	0.295959	0.263672	0.10051	0.263672	0.00695801	0.263672	0.253403	0.263672	0.913391	0.263672	0.899358
68	0.267578	0.645905	0.267578	0.113205	0.267578	0.0631714	0.267578	0.0579834	0.267578	0.342255	0.267578	0.15126	0.267578	0.352432	0.267578	0.296448	0.267578	0.102356	0.267578	0.00721741	0.267578	0.254059	0.267578	0.913391	0.267578	0.900458
69	0.271484	0.65004	0.271484	0.113205	0.271484	0.0643005	0.271484	0.0608063	0.271484	0.347336	0.271484	0.155014	0.271484	0.357468	0.271484	0.297058	0.271484	0.104431	0.271484	0.00761414	0.271484	0.255081	0.271484	0.913391	0.271484	0.901521
70	0.275391	0.654678	0.275391	0.118042	0.275391	0.0643005	0.275391	0.0636597	0.275391	0.351959	0.275391	0.158524	0.275391	0.362137	0.275391	0.297668	0.275391	0.106461	0.275391	0.00761414	0.275391	0.255875	0.275391	0.913391	0.275391	0.9025
71	0.279297	0.659164	0.279297	0.122894	0.279297	0.0653687	0.279297	0.0666809	0.279297	0.356506	0.279297	0.158524	0.279297	0.366699	0.279297	0.298416	0.279297	0.108521	0.279297	0.00791931	0.279297	0.256683	0.279297	0.913391	0.279297	0.903446
72	0.283203	0.663559	0.283203	0.128036	0.283203	0.0666351	0.283203	0.0666809	0.283203	0.360565	0.283203	0.162109	0.283203	0.371094	0.283203	0.299179	0.283203	0.110672	0.283203	0.00805664	0.283203	0.257233	0.283203	0.913391	0.283203	0.904442
73	0.287109	0.668549	0.287109	0.132782	0.287109	0.0666351	0.287109	0.0697784	0.287109	0.360565	0.287109	0.165756	0.287109	0.375595	0.287109	0.299927	0.287109	0.110672	0.287109	0.00830078	0.287109	0.25795	0.287109	0.913391	0.287109	0.9054
74	0.291016	0.673248	0.291016	0.13765	0.291016	0.0677948	0.291016	0.073288	0.291016	0.365051	0.291016	0.169434	0.291016	0.375595	0.291016	0.300537	0.291016	0.113037	0.291016	0.0085144	0.291016	0.258743	0.291016	0.913452	0.291016	0.906292
75	0.294922	0.673248	0.294922	0.142258	0.294922	0.0690918	0.294922	0.0761719	0.294922	0.369507	0.294922	0.172897	0.294922	0.380447	0.294922	0.301239	0.294922	0.115295	0.294922	0.0088501	0.294922	0.259506	0.294922	0.913452	0.294922	0.907271
76	0.298828	0.67865	0.298828	0.146362	0.298828	0.0702515	0.298828	0.0797272	0.298828	0.373642	0.298828	0.176147	0.298828	0.38504	0.298828	0.301865	0.298828	0.117798	0.298828	0.0091095	0.298828	0.259506	0.298828	0.914185	0.298828	0.908275
77	0.302734	0.683914	0.302734	0.146362	0.302734	0.0702515	0.302734	0.0797272	0.302734	0.378281	0.302734	0.179565	0.302734	0.389679	0.302734	0.302612	0.302734	0.120331	0.302734	0.00946045	0.302734	0.260193	0.302734	0.917236	0.302734	0.9093
78	0.306641	0.689789	0.306641	0.150818	0.306641	0.0718384	0.306641	0.0828705	0.306641	0.38208	0.306641	0.183258	0.306641	0.394196	0.306641	0.303497	0.306641	0.122528	0.306641	0.00973511	0.306641	0.261169	0.306641	0.927551	0.306641	0.910283
79	0.310547	0.695068	0.310547	0.155853	0.310547	0.07341	0.310547	0.0864563	0.310547	0.385559	0.310547	0.183258	0.310547	0.398605	0.310547	0.304108	0.310547	0.122528	0.310547	0.00973511	0.310547	0.261963	0.310547	0.940308	0.310547	0.911275
80	0.314453	0.700424	0.314453	0.159714	0.314453	0.07341	0.314453	0.0898132	0.314453	0.388885	0.314453	0.187149	0.314453	0.403564	0.314453	0.304749	0.314453	0.124893	0.314453	0.0100708	0.314453	0.263	0.314453	0.95105	0.314453	0.912162
81	0.318359	0.705673	0.318359	0.162491	0.318359	0.0752258	0.318359	0.0929565	0.318359	0.392746	0.318359	0.190704	0.318359	0.407867	0.318359	0.305557	0.318359	0.12767	0.318359	0.0102844	0.318359	0.264053	0.318359	0.9552	0.318359	0.913254
82	0.322266	0.710846	0.322266	0.165298	0.322266	0.0769043	0.322266	0.0929565	0.322266	0.392746	0.322266	0.194122	0.322266	0.412384	0.322266	0.306259	0.322266	0.130447	0.322266	0.0106354	0.322266	0.26503	0.322266	0.956177	0.322266	0.914262
83	0.326172	0.71579	0.326172	0.16777	0.326172	0.0788116	0.326172	0.0970764	0.326172	0.39653	0.326172	0.197922	0.326172	0.416611	0.326172	0.3069	0.326172	0.132828	0.326172	0.0107727	0.326172	0.265869	0.326172	0.956177	0.326172	0.915129
84	0.330078	0.721359	0.330078	0.170441	0.330078	0.0788116	0.330078	0.101074	0.330078	0.400436	0.330078	0.202606	0.330078	0.420639	0.330078	0.307434	0.330078	0.135681	0.330078	0.0110321	0.330078	0.26712	0.330078	0.956177	0.330078	0.915942
85	0.333984	0.721359	0.333984	0.170441	0.333984	0.0808411	0.333984	0.105194	0.333984	0.403732	0.333984	0.207291	0.333984	0.420639	0.333984	0.30809	0.333984	0.135681	0.333984	0.0112457	0.333984	0.268524	0.333984	0.956177	0.333984	0.916775
86	0.337891	0.7267	0.337891	0.173386	0.337891	0.0831604	0.337891	0.105194	0.337891	0.406937	0.337891	0.212509	0.337891	0.424927	0.337891	0.308945	0.337891	0.138336	0.337891	0.0114899	0.337891	0.269867	0.337891	0.956177	0.337891	0.917658
87	0.341797	0.731781	0.341797	0.1763	0.341797	0.0831604	0.341797	0.10939	0.341797	0.410248	0.341797	0.212509	0.341797	0.429245	0.341797	0.309387	0.341797	0.141159	0.341797	0.011734	0.341797	0.271011	0.341797	0.956177	0.341797	0.918575
88	0.345703	0.737305	0.345703	0.179504	0.345703	0.0856934	0.345703	0.114349	0.345703	0.413528	0.345703	0.21814	0.345703	0.43338	0.345703	0.310043	0.345703	0.143738	0.345703	0.011734	0.345703	0.27269	0.345703	0.956177	0.345703	0.919379
89	0.349609	0.74234	0.349609	0.183151	0.349609	0.0880127	0.349609	0.118652	0.349609	0.41684	0.349609	0.224594	0.349609	0.437485	0.349609	0.310654	0.349609	0.146362	0.349609	0.0118713	0.349609	0.27388	0.349609	0.956177	0.349609	0.92025
90	0.353516	0.748047	0.353516	0.186966	0.353516	0.0904083	0.353516	0.123642	0.353516	0.420105	0.353516	0.231476	0.353516	0.441498	0.353516	0.311401	0.353516	0.148941	0.353516	0.012085	0.353516	0.275421	0.353516	0.956177	0.353516	0.921083
91	0.357422	0.752823	0.357422	0.191742	0.357422	0.0904083	0.357422	0.123642	0.357422	0.420105	0.357422	0.238541	0.357422	0.445892	0.357422	0.312027	0.357422	0.148941	0.357422	0.0122223	0.357422	0.276733	0.357422	0.956177	0.357422	0.921958
92	0.361328	0.757889	0.361328	0.196899	0.361328	0.0929413	0.361328	0.127975	0.361328	0.423477	0.361328	0.245575	0.361328	0.449982	0.361328	0.312714	0.361328	0.151413	0.361328	0.0123749	0.361328	0.278503	0.361328	0.956177	0.361328	0.922663
93	0.365234	0.76265	0.365234	0.196899	0.365234	0.0956116	0.365234	0.132782	0.365234	0.426559	0.365234	0.253204	0.365234	0.454178	0.365234	0.313354	0.365234	0.15387	0.365234	0.0126801	0.365234	0.280563	0.365234	0.956177	0.365234	0.923446
94	0.369141	0.76265	0.369141	0.20224	0.369141	0.0956116	0.369141	0.13797	0.369141	0.42981	0.369141	0.26088	0.369141	0.459045	0.369141	0.31395	0.369141	0.15654	0.369141	0.0128174	0.369141	0.282761	0.369141	0.956177	0.369141	0.924208
95	0.373047	0.767975	0.373047	0.207352	0.373047	0.0985718	0.373047	0.143143	0.373047	0.433105	0.373047	0.26088	0.373047	0.459045	0.373047	0.314743	0.373047	0.158813	0.373047	0.0131073	0.373047	0.284973	0.373047	0.956177	0.373047	0.924821
96	0.376953	0.773331	0.376953	0.212982	0.376953	0.101105	0.376953	0.143143	0.376953	0.436615	0.376953	0.269226	0.376953	0.463425	0.376953	0.315506	0.376953	0.161301	0.376953	0.0135193	0.376953	0.28772	0.376953	0.956177	0.376953	0.925458
97	0.380859	0.778198	0.380859	0.218475	0.380859	0.103775	0.380859	0.148514	0.380859	0.439606	0.380859	0.277573	0.380859	0.468231	0.380859	0.316299	0.380859	0.161301	0.380859	0.0135193	0.380859	0.29007	0.380859	0.956177	0.380859	0.926063
98	0.384766	0.783325	0.384766	0.224487	0.384766	0.103775	0.384766	0.153748	0.384766	0.44278	0.384766	0.286621	0.384766	0.472534	0.384766	0.317032	0.384766	0.163971	0.384766	0.0137177	0.384766	0.292801	0.384766	0.956177	0.384766	0.926604
99	0.388672	0.787903	0.388672	0.230408	0.388672	0.106506	0.388672	0.159332	0.388672	0.446274	0.388672	0.296204	0.388672	0.476944	0.388672	0.317749	0.388672	0.166031	0.388672	0.0141296	0.388672	0.295532	0.388672	0.956177	0.388672	0.927217
100	0.392578	0.792114	0.392578	0.230408	0.392578	0.109482	0.392578	0.165024	0.392578	0.446274	0.392578	0.304977	0.392578	0.481918	0.392578	0.318588	0.392578	0.168243	0.392578	0.0143127	0.392578	0.299057	0.392578	0.956177	0.392578	0.927771
101	0.396484	0.796326	0.396484	0.236313	0.396484	0.109482	0.396484	0.165024	0.396484	0.44986	0.396484	0.314636	0.396484	0.485977	0.396484	0.319321	0.396484	0.170425	0.396484	0.0145416	0.396484	0.302155	0.396484	0.956177	0.396484	0.928321
102	0.400391	0.800522	0.400391	0.241745	0.400391	0.112183	0.400391	0.170303	0.400391	0.453003	0.400391	0.323578	0.400391	0.491074	0.400391	0.320129	0.400391	0.172379	0.400391	0.0147095	0.400391	0.302155	0.400391	0.956238	0.400391	0.928925
103	0.404297	0.805313	0.404297	0.246552	0.404297	0.114761	0.404297	0.175888	0.404297	0.455658	0.404297	0.323578	0.404297	0.496292	0.404297	0.32103	0.404297	0.172379	0.404297	0.0150604	0.404297	0.305145	0.404297	0.956482	0.404297	0.929483
104	0.408203	0.805313	0.408203	0.251251	0.408203	0.117538	0.408203	0.182022	0.408203	0.458481	0.408203	0.333145	0.408203	0.501282	0.408203	0.321808	0.408203	0.174469	0.408203	0.0152588	0.408203	0.308578	0.408203	0.956848	0.408203	0.9302
105	0.412109	0.809723	0.412109	0.255981	0.412109	0.117538	0.412109	0.188049	0.412109	0.461441	0.412109	0.34346	0.412109	0.506348	0.412109	0.32251	0.412109	0.176361	0.412109	0.0152588	0.412109	0.312317	0.412109	0.957031	0.412109	0.930829
106	0.416016	0.81369	0.416016	0.260208	0.416016	0.120285	0.416016	0.188049	0.416016	0.464355	0.416016	0.354477	0.416016	0.506348	0.416016	0.323318	0.416016	0.178406	0.416016	0.0155334	0.416016	0.315918	0.416016	0.957031	0.416016	0.931462
107	0.419922	0.817673	0.419922	0.265091	0.419922	0.122955	0.419922	0.194321	0.419922	0.4673	0.419922	0.365799	0.419922	0.511444	0.419922	0.323959	0.419922	0.180374	0.419922	0.0157623	0.419922	0.319977	0.419922	0.957031	0.419922	0.932096
108	0.423828	0.822296	0.423828	0.265091	0.423828	0.122955	0.423828	0.200439	0.423828	0.470047	0.423828	0.377365	0.423828	0.516388	0.423828	0.324738	0.423828	0.182648	0.423828	0.0160065	0.423828	0.324036	0.423828	0.957031	0.423828	0.932696
109	0.427734	0.826447	0.427734	0.270172	0.427734	0.125336	0.427734	0.206161	0.427734	0.470047	0.427734	0.38855	0.427734	0.521606	0.427734	0.325333	0.427734	0.182648	0.427734	0.0163269	0.427734	0.328247	0.427734	0.957031	0.427734	0.933338
110	0.431641	0.830673	0.431641	0.275391	0.431641	0.127625	0.431641	0.212051	0.431641	0.472778	0.431641	0.398132	0.431641	0.527237	0.431641	0.326004	0.431641	0.184753	0.431641	0.0167389	0.431641	0.332932	0.431641	0.957031	0.431641	0.933929
111	0.435547	0.834915	0.435547	0.28215	0.435547	0.1297	0.435547	0.212051	0.435547	0.475052	0.435547	0.398132	0.435547	0.532578	0.435547	0.326904	0.435547	0.186584	0.435547	0.0171509	0.435547	0.337448	0.435547	0.957031	0.435547	0.934525
112	0.439453	0.838913	0.439453	0.290817	0.439453	0.1297	0.439453	0.218826	0.439453	0.477463	0.439453	0.406036	0.439453	0.537674	0.439453	0.327606	0.439453	0.188629	0.439453	0.0175171	0.439453	0.341797	0.439453	0.957031	0.439453	0.935079
113	0.443359	0.838913	0.443359	0.301147	0.443359	0.131836	0.443359	0.22525	0.443359	0.479919	0.443359	0.413483	0.443359	0.54393	0.443359	0.328262	0.443359	0.190704	0.443359	0.0181427	0.443359	0.34613	0.443359	0.957031	0.443359	0.935708
114	0.447266	0.843018	0.447266	0.313843	0.447266	0.133728	0.447266	0.231766	0.447266	0.482407	0.447266	0.419937	0.447266	0.549835	0.447266	0.329117	0.447266	0.192825	0.447266	0.0181427	0.447266	0.350632	0.447266	0.957031	0.447266	0.936288
115	0.451172	0.846664	0.451172	0.330307	0.451172	0.133728	0.451172	0.231766	0.451172	0.485229	0.451172	0.425125	0.451172	0.555603	0.451172	0.3302	0.451172	0.192825	0.451172	0.0185852	0.451172	0.355148	0.451172	0.957031	0.451172	0.93675
116	0.455078	0.850311	0.455078	0.330307	0.455078	0.135437	0.455078	0.238037	0.455078	0.488052	0.455078	0.430496	0.455078	0.561096	0.455078	0.331177	0.455078	0.195267	0.455078	0.0190735	0.455078	0.360199	0.455078	0.957031	0.455078	0.937275
117	0.458984	0.853745	0.458984	0.349396	0.458984	0.137115	0.458984	0.244278	0.458984	0.490662	0.458984	0.43573	0.458984	0.561096	0.458984	0.332367	0.458984	0.197388	0.458984	0.0195007	0.458984	0.365173	0.458984	0.957031	0.458984	0.937775
118	0.462891	0.857086	0.462891	0.371124	0.462891	0.138931	0.462891	0.251419	0.462891	0.490662	0.462891	0.440552	0.462891	0.567764	0.462891	0.333603	0.462891	0.199615	0.462891	0.0200043	0.462891	0.370361	0.462891	0.957031	0.462891	0.938258
119	0.466797	0.86055	0.466797	0.394592	0.466797	0.138931	0.466797	0.257782	0.466797	0.49292	0.466797	0.440552	0.466797	0.574524	0.466797	0.335007	0.466797	0.201782	0.466797	0.0205078	0.466797	0.375717	0.466797	0.957031	0.466797	0.938725
120	0.470703	0.863556	0.470703	0.419312	0.470703	0.140457	0.470703	0.257782	0.470703	0.495163	0.470703	0.445633	0.470703	0.582153	0.470703	0.336395	0.470703	0.203766	0.470703	0.0211792	0.470703	0.381073	0.470703	0.957031	0.470703	0.939192
121	0.474609	0.866898	0.474609	0.443726	0.474609	0.142319	0.474609	0.264404	0.474609	0.497375	0.474609	0.450317	0.474609	0.58931	0.474609	0.337646	0.474609	0.203766	0.474609	0.0218048	0.474609	0.386566	0.474609	0.957031	0.474609	0.939704
122	0.478516	0.87056	0.478516	0.468048	0.478516	0.142319	0.478516	0.271774	0.478516	0.499481	0.478516	0.454788	0.478516	0.595917	0.478516	0.339127	0.478516	0.205795	0.478516	0.0223846	0.478516	0.392044	0.478516	0.957031	0.478516	0.940158
123	0.482422	0.87056	0.482422	0.491043	0.482422	0.144028	0.482422	0.278809	0.482422	0.501694	0.482422	0.45903	0.482422	0.603195	0.482422	0.340897	0.482422	0.207932	0.482422	0.0223846	0.482422	0.3983	0.482422	0.957031	0.482422	0.940583
124	0.486328	0.873962	0.486328	0.491043	0.486328	0.145859	0.486328	0.286591	0.486328	0.50386	0.486328	0.463394	0.486328	0.610565	0.486328	0.342392	0.486328	0.210068	0.486328	0.0230865	0.486328	0.404007	0.486328	0.957031	0.486328	0.940975
125	0.490234	0.877365	0.490234	0.510635	0.490234	0.147598	0.490234	0.286591	0.490234	0.506012	0.490234	0.46785	0.490234	0.617615	0.490234	0.344238	0.490234	0.212143	0.490234	0.0237274	0.490234	0.409973	0.490234	0.957031	0.490234	0.941458
126	0.494141	0.880798	0.494141	0.527298	0.494141	0.147598	0.494141	0.294037	0.494141	0.507965	0.494141	0.471771	0.494141	0.624069	0.494141	0.346008	0.494141	0.214294	0.494141	0.024704	0.494141	0.416336	0.494141	0.957031	0.494141	0.942
127	0.498047	0.883362	0.498047	0.540787	0.498047	0.149109	0.498047	0.301941	0.498047	0.507965	0.498047	0.471771	0.498047	0.624069	0.498047	0.347839	0.498047	0.214294	0.498047	0.0255737	0.498047	0.416336	0.498047	0.957031	0.498047	0.942504
128	0.501953	0.886246	0.501953	0.55101	0.501953	0.15065	0.501953	0.310455	0.501953	0.510376	0.501953	0.476135	0.501953	0.630615	0.501953	0.350067	0.501953	0.216431	0.501953	0.0267181	0.501953	0.422958	0.501953	0.957031	0.501953	0.942929
129	0.505859	0.88916	0.505859	0.559341	0.505859	0.15065	0.505859	0.318283	0.505859	0.512161	0.505859	0.480026	0.505859	0.637009	0.505859	0.352432	0.505859	0.218918	0.505859	0.027771	0.505859	0.429321	0.505859	0.957031	0.505859	0.943329
130	0.509766	0.89151	0.509766	0.566391	0.509766	0.152512	0.509766	0.318283	0.509766	0.514282	0.509766	0.484222	0.509766	0.643082	0.509766	0.35495	0.509766	0.221237	0.509766	0.0290833	0.509766	0.435745	0.509766	0.957031	0.509766	0.943808
131	0.513672	0.894028	0.513672	0.566391	0.513672	0.154083	0.513672	0.327408	0.513672	0.516769	0.513672	0.488205	0.513672	0.649582	0.513672	0.357513	0.513672	0.223648	0.513672	0.0302124	0.513672	0.441956	0.513672	0.957031	0.513672	0.944287
132	0.517578	0.894028	0.517578	0.572556	0.517578	0.155777	0.517578	0.33728	0.517578	0.518814	0.517578	0.492111	0.517578	0.656052	0.517578	0.36058	0.517578	0.226379	0.517578	0.0302124	0.517578	0.448242	0.517578	0.957031	0.517578	0.944829
133	0.521484	0.896729	0.521484	0.577133	0.521484	0.155777	0.521484	0.348114	0.521484	0.521103	0.521484	0.495972	0.521484	0.661713	0.521484	0.36377	0.521484	0.228897	0.521484	0.0314941	0.521484	0.453979	0.521484	0.957031	0.521484	0.94525
134	0.525391	0.899094	0.525391	0.581039	0.525391	0.157425	0.525391	0.359177	0.525391	0.52298	0.525391	0.500275	0.525391	0.668365	0.525391	0.36673	0.525391	0.228897	0.525391	0.0327911	0.525391	0.459549	0.525391	0.957031	0.525391	0.945746
135	0.529297	0.901581	0.529297	0.58429	0.529297	0.159286	0.529297	0.359177	0.529297	0.525009	0.529297	0.500275	0.529297	0.67395	0.529297	0.370605	0.529297	0.231293	0.529297	0.0341644	0.529297	0.465744	0.529297	0.957031	0.529297	0.946146
136	0.533203	0.904221	0.533203	0.587051	0.533203	0.159286	0.533203	0.369873	0.533203	0.526855	0.533203	0.504318	0.533203	0.680145	0.533203	0.374741	0.533203	0.233582	0.533203	0.0358276	0.533203	0.471527	0.533203	0.957031	0.533203	0.946633
137	0.537109	0.906876	0.537109	0.589111	0.537109	0.161118	0.537109	0.381165	0.537109	0.526855	0.537109	0.508072	0.537109	0.686111	0.537109	0.378998	0.537109	0.236191	0.537109	0.037674	0.537109	0.476913	0.537109	0.957031	0.537109	0.947158
138	0.541016	0.909698	0.541016	0.591309	0.541016	0.163116	0.541016	0.392029	0.541016	0.528854	0.541016	0.511612	0.541016	0.686111	0.541016	0.383286	0.541016	0.238571	0.541016	0.0393524	0.541016	0.482315	0.541016	0.957031	0.541016	0.947675
139	0.544922	0.912552	0.544922	0.591309	0.544922	0.164871	0.544922	0.40358	0.544922	0.530899	0.544922	0.515793	0.544922	0.692184	0.544922	0.388443	0.544922	0.240921	0.544922	0.0411987	0.544922	0.487762	0.544922	0.957031	0.544922	0.948108
140	0.548828	0.915527	0.548828	0.593094	0.548828	0.164871	0.548828	0.40358	0.548828	0.533203	0.548828	0.519562	0.548828	0.698776	0.548828	0.393982	0.548828	0.240921	0.548828	0.043045	0.548828	0.493484	0.548828	0.957031	0.548828	0.948617
141	0.552734	0.918396	0.552734	0.594788	0.552734	0.166779	0.552734	0.415756	0.552734	0.535172	0.552734	0.523453	0.552734	0.705521	0.552734	0.399933	0.552734	0.243317	0.552734	0.043045	0.552734	0.499237	0.552734	0.957031	0.552734	0.949079
142	0.556641	0.918396	0.556641	0.596375	0.556641	0.16861	0.556641	0.427094	0.556641	0.53717	0.556641	0.527008	0.556641	0.711761	0.556641	0.407211	0.556641	0.245697	0.556641	0.0452271	0.556641	0.505402	0.556641	0.957031	0.556641	0.949496
143	0.560547	0.92157	0.560547	0.597809	0.560547	0.16861	0.560547	0.43837	0.560547	0.538757	0.560547	0.527008	0.560547	0.718399	0.560547	0.4151	0.560547	0.24826	0.560547	0.0475006	0.560547	0.511444	0.560547	0.957031	0.560547	0.949954
144	0.564453	0.924698	0.564453	0.59906	0.564453	0.17038	0.564453	0.43837	0.564453	0.540512	0.564453	0.53096	0.564453	0.725952	0.564453	0.424026	0.564453	0.250626	0.564453	0.0501404	0.564453	0.518509	0.564453	0.957031	0.564453	0.950429
145	0.568359	0.928055	0.568359	0.600616	0.568359	0.172363	0.568359	0.449875	0.568359	0.542435	0.568359	0.534348	0.568359	0.733093	0.568359	0.433197	0.568359	0.252945	0.568359	0.0528564	0.568359	0.526505	0.568359	0.957031	0.568359	0.950913
146	0.572266	0.93158	0.572266	0.601761	0.572266	0.174118	0.572266	0.460449	0.572266	0.542435	0.572266	0.537918	0.572266	0.740585	0.572266	0.442657	0.572266	0.252945	0.572266	0.0556641	0.572266	0.5345	0.572266	0.957031	0.572266	0.951433
147	0.576172	0.934647	0.576172	0.601761	0.576172	0.174118	0.576172	0.471649	0.576172	0.544327	0.576172	0.542328	0.576172	0.747086	0.576172	0.452133	0.576172	0.255356	0.576172	0.0587311	0.576172	0.542389	0.576172	0.957031	0.576172	0.951975
148	0.580078	0.937668	0.580078	0.603027	0.580078	0.17601	0.580078	0.482559	0.580078	0.546127	0.580078	0.546844	0.580078	0.753998	0.580078	0.463043	0.580078	0.257492	0.580078	0.0617371	0.580078	0.551559	0.580078	0.957031	0.580078	0.952579
149	0.583984	0.941086	0.583984	0.60437	0.583984	0.178497	0.583984	0.482559	0.583984	0.548004	0.583984	0.551254	0.583984	0.753998	0.583984	0.473969	0.583984	0.259827	0.583984	0.0643768	0.583984	0.560242	0.583984	0.957031	0.583984	0.953187
150	0.587891	0.94397	0.587891	0.605621	0.587891	0.178497	0.587891	0.493408	0.587891	0.55011	0.587891	0.555756	0.587891	0.760864	0.587891	0.486176	0.587891	0.262024	0.587891	0.0643768	0.587891	0.568878	0.587891	0.957031	0.587891	0.953762
151	0.591797	0.94397	0.591797	0.606583	0.591797	0.180557	0.591797	0.504028	0.591797	0.552185	0.591797	0.555756	0.591797	0.767868	0.591797	0.498169	0.591797	0.264221	0.591797	0.0671692	0.591797	0.577225	0.591797	0.957031	0.591797	0.954375
152	0.595703	0.946609	0.595703	0.607727	0.595703	0.182892	0.595703	0.514038	0.595703	0.554718	0.595703	0.560501	0.595703	0.77388	0.595703	0.511887	0.595703	0.264221	0.595703	0.0697937	0.595703	0.585403	0.595703	0.957031	0.595703	0.954933
153	0.599609	0.949142	0.599609	0.60907	0.599609	0.185196	0.599609	0.523605	0.599609	0.557114	0.599609	0.565628	0.599609	0.780441	0.599609	0.525803	0.599609	0.266479	0.599609	0.0730591	0.599609	0.585403	0.599609	0.957031	0.599609	0.955592
154	0.603516	0.951813	0.603516	0.610382	0.603516	0.185196	0.603516	0.523605	0.603516	0.559631	0.603516	0.570541	0.603516	0.786575	0.603516	0.539154	0.603516	0.269073	0.603516	0.0761871	0.603516	0.59552	0.603516	0.957031	0.603516	0.956333
155	0.607422	0.954086	0.607422	0.610382	0.607422	0.187393	0.607422	0.534103	0.607422	0.559631	0.607422	0.57608	0.607422	0.792435	0.607422	0.552643	0.607422	0.271866	0.607422	0.0797729	0.607422	0.60463	0.607422	0.957031	0.607422	0.957125
156	0.611328	0.956635	0.611328	0.612106	0.611328	0.189896	0.611328	0.543732	0.611328	0.562225	0.611328	0.581619	0.611328	0.798599	0.611328	0.566391	0.611328	0.274246	0.611328	0.0830688	0.611328	0.614822	0.611328	0.957031	0.611328	0.957921
157	0.615234	0.95871	0.615234	0.613892	0.615234	0.189896	0.615234	0.553284	0.615234	0.565125	0.615234	0.587067	0.615234	0.804825	0.615234	0.579773	0.615234	0.276672	0.615234	0.0866241	0.615234	0.626175	0.615234	0.957031	0.615234	0.958779
158	0.619141	0.960831	0.619141	0.616013	0.619141	0.192078	0.619141	0.562698	0.619141	0.567764	0.619141	0.593109	0.619141	0.811035	0.619141	0.59346	0.619141	0.276672	0.619141	0.0866241	0.619141	0.63797	0.619141	0.957031	0.619141	0.959554
159	0.623047	0.962921	0.623047	0.61821	0.623047	0.193832	0.623047	0.562698	0.623047	0.571167	0.623047	0.593109	0.623047	0.811035	0.623047	0.606018	0.623047	0.279053	0.623047	0.0903931	0.623047	0.651703	0.623047	0.957031	0.623047	0.960604
160	0.626953	0.964539	0.626953	0.62056	0.626953	0.195816	0.626953	0.57222	0.626953	0.574203	0.626953	0.59906	0.626953	0.817062	0.626953	0.618286	0.626953	0.281265	0.626953	0.0943146	0.626953	0.66568	0.626953	0.957031	0.626953	0.961571
161	0.630859	0.964539	0.630859	0.622559	0.630859	0.195816	0.630859	0.581467	0.630859	0.57756	0.630859	0.604431	0.630859	0.823654	0.630859	0.629807	0.630859	0.283447	0.630859	0.098465	0.630859	0.684311	0.630859	0.957031	0.630859	0.962621
162	0.634766	0.966385	0.634766	0.622559	0.634766	0.197693	0.634766	0.590408	0.634766	0.580856	0.634766	0.610291	0.634766	0.829895	0.634766	0.639816	0.634766	0.285812	0.634766	0.102814	0.634766	0.702225	0.634766	0.957031	0.634766	0.963625
163	0.638672	0.967941	0.638672	0.624527	0.638672	0.199524	0.638672	0.599716	0.638672	0.583923	0.638672	0.616364	0.638672	0.836304	0.638672	0.648376	0.638672	0.288345	0.638672	0.106796	0.638672	0.720627	0.638672	0.957031	0.638672	0.964612
164	0.642578	0.969757	0.642578	0.625946	0.642578	0.199524	0.642578	0.599716	0.642578	0.583923	0.642578	0.622498	0.642578	0.843018	0.642578	0.655487	0.642578	0.288345	0.642578	0.110779	0.642578	0.738739	0.642578	0.957031	0.642578	0.96565
165	0.646484	0.971329	0.646484	0.627167	0.646484	0.201553	0.646484	0.6082	0.646484	0.586838	0.646484	0.628571	0.646484	0.849304	0.646484	0.661087	0.646484	0.290741	0.646484	0.115173	0.646484	0.755585	0.646484	0.957031	0.646484	0.966721
166	0.650391	0.972748	0.650391	0.628281	0.650391	0.203445	0.650391	0.617035	0.650391	0.589523	0.650391	0.634583	0.650391	0.855408	0.650391	0.666016	0.650391	0.29303	0.650391	0.119812	0.650391	0.770203	0.650391	0.957031	0.650391	0.967896
167	0.654297	0.97438	0.654297	0.629013	0.654297	0.20546	0.654297	0.625076	0.654297	0.592499	0.654297	0.634583	0.654297	0.860962	0.654297	0.669876	0.654297	0.295609	0.654297	0.119812	0.654297	0.78537	0.654297	0.957031	0.654297	0.969121
168	0.658203	0.975525	0.658203	0.629929	0.658203	0.20546	0.658203	0.634094	0.658203	0.595673	0.658203	0.640945	0.658203	0.866989	0.658203	0.673416	0.658203	0.297882	0.658203	0.124405	0.658203	0.799469	0.658203	0.957031	0.658203	0.970329
169	0.662109	0.976913	0.662109	0.630753	0.662109	0.207184	0.662109	0.634094	0.662109	0.598633	0.662109	0.647537	0.662109	0.872894	0.662109	0.676178	0.662109	0.299973	0.662109	0.128693	0.662109	0.81134	0.662109	0.957031	0.662109	0.971437
170	0.666016	0.976913	0.666016	0.630753	0.666016	0.209167	0.666016	0.64212	0.666016	0.601791	0.666016	0.653488	0.666016	0.872894	0.666016	0.678818	0.666016	0.299973	0.666016	0.133194	0.666016	0.822464	0.666016	0.957031	0.666016	0.972712
171	0.669922	0.977829	0.669922	0.631668	0.669922	0.209167	0.669922	0.650192	0.669922	0.605133	0.669922	0.659851	0.669922	0.878983	0.669922	0.680862	0.669922	0.302246	0.669922	0.138123	0.669922	0.833206	0.669922	0.957031	0.669922	0.973842
172	0.673828	0.978699	0.673828	0.632339	0.673828	0.211151	0.673828	0.65831	0.673828	0.607971	0.673828	0.666336	0.673828	0.884506	0.673828	0.682693	0.673828	0.304657	0.673828	0.142914	0.673828	0.843491	0.673828	0.957031	0.673828	0.974871
173	0.677734	0.979324	0.677734	0.632935	0.677734	0.213135	0.677734	0.65831	0.677734	0.607971	0.677734	0.672791	0.677734	0.889877	0.677734	0.684387	0.677734	0.307053	0.677734	0.147659	0.677734	0.853699	0.677734	0.957031	0.677734	0.976087
174	0.681641	0.979782	0.681641	0.633804	0.681641	0.215012	0.681641	0.66571	0.681641	0.610886	0.681641	0.679428	0.681641	0.895157	0.681641	0.685608	0.681641	0.309509	0.681641	0.152908	0.681641	0.863342	0.681641	0.957031	0.681641	0.977233
175	0.685547	0.980469	0.685547	0.634781	0.685547	0.215012	0.685547	0.673569	0.685547	0.613968	0.685547	0.679428	0.685547	0.900024	0.685547	0.686646	0.685547	0.311859	0.685547	0.157761	0.685547	0.873535	0.685547	0.957031	0.685547	0.978196
176	0.689453	0.981201	0.689453	0.635391	0.689453	0.217041	0.689453	0.681229	0.689453	0.617126	0.689453	0.686325	0.689453	0.904999	0.689453	0.687759	0.689453	0.311859	0.689453	0.157761	0.689453	0.883728	0.689453	0.957031	0.689453	0.979217
177	0.693359	0.981796	0.693359	0.636124	0.693359	0.219284	0.693359	0.68869	0.693359	0.621048	0.693359	0.693222	0.693359	0.909729	0.693359	0.688751	0.693359	0.314621	0.693359	0.16304	0.693359	0.894257	0.693359	0.957031	0.693359	0.9802
178	0.697266	0.982635	0.697266	0.636124	0.697266	0.219284	0.697266	0.68869	0.697266	0.62529	0.697266	0.699753	0.697266	0.914612	0.697266	0.689636	0.697266	0.317154	0.697266	0.167831	0.697266	0.903885	0.697266	0.957031	0.697266	0.981275
179	0.701172	0.983398	0.701172	0.636887	0.701172	0.221756	0.701172	0.696655	0.701172	0.630783	0.701172	0.706528	0.701172	0.919693	0.701172	0.690613	0.701172	0.319778	0.701172	0.173172	0.701172	0.903885	0.701172	0.957031	0.701172	0.982279
180	0.705078	0.983398	0.705078	0.637466	0.705078	0.224075	0.705078	0.704056	0.705078	0.636551	0.705078	0.713623	0.705078	0.924194	0.705078	0.691513	0.705078	0.322586	0.705078	0.178711	0.705078	0.9142	0.705078	0.957031	0.705078	0.983171
181	0.708984	0.984039	0.708984	0.638153	0.708984	0.226334	0.708984	0.71167	0.708984	0.643661	0.708984	0.721207	0.708984	0.924194	0.708984	0.692368	0.708984	0.325256	0.708984	0.184113	0.708984	0.924973	0.708984	0.957031	0.708984	0.984017
182	0.712891	0.984543	0.712891	0.639236	0.712891	0.226334	0.712891	0.719589	0.712891	0.643661	0.712891	0.728683	0.712891	0.92868	0.712891	0.693329	0.712891	0.325256	0.712891	0.189117	0.712891	0.934662	0.712891	0.957031	0.712891	0.984871
183	0.716797	0.985184	0.716797	0.640564	0.716797	0.228668	0.716797	0.719589	0.716797	0.652359	0.716797	0.728683	0.716797	0.932541	0.716797	0.694138	0.716797	0.328308	0.716797	0.194565	0.716797	0.944412	0.716797	0.957031	0.716797	0.985708
184	0.720703	0.98587	0.720703	0.642166	0.720703	0.230988	0.720703	0.727203	0.720703	0.660477	0.720703	0.736481	0.720703	0.936111	0.720703	0.694794	0.720703	0.33107	0.720703	0.200211	0.720703	0.952637	0.720703	0.957031	0.720703	0.986487
185	0.724609	0.986404	0.724609	0.64418	0.724609	0.230988	0.724609	0.734436	0.724609	0.669266	0.724609	0.744522	0.724609	0.939728	0.724609	0.695465	0.724609	0.334656	0.724609	0.200211	0.724609	0.960953	0.724609	0.957031	0.724609	0.987204
186	0.728516	0.986969	0.728516	0.64418	0.728516	0.233765	0.728516	0.741196	0.728516	0.677811	0.728516	0.752548	0.728516	0.942764	0.728516	0.696274	0.728516	0.33783	0.728516	0.206543	0.728516	0.967651	0.728516	0.957031	0.728516	0.988008
187	0.732422	0.987747	0.732422	0.645218	0.732422	0.236557	0.732422	0.748047	0.732422	0.687286	0.732422	0.759766	0.732422	0.945267	0.732422	0.696854	0.732422	0.34079	0.732422	0.212799	0.732422	0.972687	0.732422	0.957031	0.732422	0.988771
188	0.736328	0.988434	0.736328	0.64595	0.736328	0.239716	0.736328	0.748047	0.736328	0.699249	0.736328	0.766113	0.736328	0.947266	0.736328	0.697617	0.736328	0.34079	0.736328	0.219254	0.736328	0.976227	0.736328	0.957031	0.736328	0.989579
189	0.740234	0.988434	0.740234	0.646912	0.740234	0.239716	0.740234	0.755219	0.740234	0.713089	0.740234	0.772217	0.740234	0.949493	0.740234	0.698364	0.740234	0.343674	0.740234	0.226089	0.740234	0.979019	0.740234	0.957031	0.740234	0.990271
190	0.744141	0.988937	0.744141	0.648666	0.744141	0.243011	0.744141	0.762207	0.744141	0.728592	0.744141	0.778122	0.744141	0.951355	0.744141	0.70047	0.744141	0.34726	0.744141	0.232376	0.744141	0.980957	0.744141	0.957031	0.744141	0.991046
191	0.748047	0.989365	0.748047	0.653305	0.748047	0.24678	0.748047	0.770096	0.748047	0.728592	0.748047	0.778122	0.748047	0.951355	0.748047	0.705521	0.748047	0.350586	0.748047	0.238434	0.748047	0.982101	0.748047	0.957031	0.748047	0.991729
192	0.751953	0.989838	0.751953	0.664352	0.751953	0.24678	0.751953	0.77742	0.751953	0.746597	0.751953	0.783905	0.751953	0.952942	0.751953	0.710373	0.751953	0.354538	0.751953	0.245285	0.751953	0.983368	0.751953	0.957031	0.751953	0.992337
193	0.755859	0.990402	0.755859	0.664352	0.755859	0.250275	0.755859	0.77742	0.755859	0.763336	0.755859	0.789719	0.755859	0.954803	0.755859	0.715469	0.755859	0.358444	0.755859	0.251129	0.755859	0.984116	0.755859	0.957031	0.755859	0.992925
194	0.759766	0.990814	0.759766	0.695557	0.759766	0.254837	0.759766	0.784332	0.759766	0.777679	0.759766	0.795425	0.759766	0.956345	0.759766	0.722321	0.759766	0.362061	0.759766	0.251129	0.759766	0.984879	0.759766	0.957031	0.759766	0.993542
195	0.763672	0.991241	0.763672	0.760422	0.763672	0.259048	0.763672	0.791016	0.763672	0.788071	0.763672	0.801224	0.763672	0.957718	0.763672	0.731201	0.763672	0.362061	0.763672	0.257126	0.763672	0.985626	0.763672	0.957031	0.763672	0.994171
196	0.767578	0.991623	0.767578	0.839844	0.767578	0.259048	0.767578	0.798111	0.767578	0.79631	0.767578	0.807617	0.767578	0.95903	0.767578	0.742706	0.767578	0.366272	0.767578	0.263214	0.767578	0.986313	0.767578	0.957031	0.767578	0.994692
197	0.771484	0.99202	0.771484	0.897278	0.771484	0.262985	0.771484	0.805695	0.771484	0.803467	0.771484	0.814453	0.771484	0.960312	0.771484	0.756134	0.771484	0.370895	0.771484	0.269394	0.771484	0.986847	0.771484	0.957031	0.771484	0.995229
198	0.775391	0.992264	0.775391	0.928162	0.775391	0.266586	0.775391	0.805695	0.775391	0.810043	0.775391	0.821274	0.775391	0.9617	0.775391	0.768005	0.775391	0.375336	0.775391	0.275986	0.775391	0.987274	0.775391	0.957031	0.775391	0.995683
199	0.779297	0.992264	0.779297	0.943573	0.779297	0.266586	0.779297	0.812851	0.779297	0.815979	0.779297	0.821274	0.779297	0.962982	0.779297	0.780228	0.779297	0.37941	0.779297	0.282639	0.779297	0.987793	0.779297	0.957031	0.779297	0.9961
200	0.783203	0.992554	0.783203	0.951706	0.783203	0.271194	0.783203	0.820038	0.783203	0.821503	0.783203	0.827698	0.783203	0.964218	0.783203	0.79509	0.783203	0.384354	0.783203	0.289246	0.783203	0.988297	0.783203	0.957031	0.783203	0.996504
201	0.787109	0.992844	0.787109	0.951706	0.787109	0.276184	0.787109	0.827728	0.787109	0.821503	0.787109	0.834122	0.787109	0.965454	0.787109	0.808319	0.787109	0.384354	0.787109	0.296432	0.787109	0.988586	0.787109	0.957031	0.787109	0.996871
202	0.791016	0.993271	0.791016	0.957474	0.791016	0.281555	0.791016	0.827728	0.791016	0.826553	0.791016	0.840164	0.791016	0.965454	0.791016	0.821518	0.791016	0.389374	0.791016	0.303741	0.791016	0.988968	0.791016	0.957031	0.791016	0.997329
203	0.794922	0.993576	0.794922	0.961716	0.794922	0.281555	0.794922	0.8349	0.794922	0.83136	0.794922	0.845428	0.794922	0.966553	0.794922	0.832199	0.794922	0.394699	0.794922	0.303741	0.794922	0.98941	0.794922	0.957031	0.794922	0.997592
204	0.798828	0.994049	0.798828	0.96463	0.798828	0.287964	0.798828	0.842484	0.798828	0.837143	0.798828	0.851044	0.798828	0.967728	0.798828	0.843521	0.798828	0.40062	0.798828	0.312241	0.798828	0.98941	0.798828	0.957031	0.798828	0.997954
205	0.802734	0.994385	0.802734	0.966171	0.802734	0.294693	0.802734	0.850143	0.802734	0.842697	0.802734	0.857239	0.802734	0.968933	0.802734	0.85228	0.802734	0.40654	0.802734	0.320755	0.802734	0.989685	0.802734	0.957031	0.802734	0.998237
206	0.806641	0.994659	0.806641	0.967102	0.806641	0.294693	0.806641	0.857803	0.806641	0.84874	0.806641	0.863174	0.806641	0.970032	0.806641	0.864594	0.806641	0.4142	0.806641	0.328812	0.806641	0.990082	0.806641	0.957031	0.806641	0.998479
207	0.810547	0.994934	0.810547	0.967743	0.810547	0.302963	0.810547	0.857803	0.810547	0.854614	0.810547	0.863174	0.810547	0.97113	0.810547	0.88327	0.810547	0.4142	0.810547	0.337967	0.810547	0.990341	0.810547	0.957031	0.810547	0.998663
208	0.814453	0.994934	0.814453	0.968307	0.814453	0.311951	0.814453	0.864899	0.814453	0.859695	0.814453	0.869888	0.814453	0.972076	0.814453	0.897675	0.814453	0.42247	0.814453	0.346848	0.814453	0.990677	0.814453	0.957031	0.814453	0.998829
209	0.818359	0.995193	0.818359	0.968307	0.818359	0.321777	0.818359	0.872253	0.818359	0.864349	0.818359	0.877258	0.818359	0.973175	0.818359	0.90976	0.818359	0.431381	0.818359	0.355881	0.818359	0.990967	0.818359	0.957031	0.818359	0.999
210	0.822266	0.995529	0.822266	0.968704	0.822266	0.321777	0.822266	0.880295	0.822266	0.864349	0.822266	0.884628	0.822266	0.974304	0.822266	0.922791	0.822266	0.440643	0.822266	0.365814	0.822266	0.991287	0.822266	0.957031	0.822266	0.999112
211	0.826172	0.995819	0.826172	0.969345	0.826172	0.332733	0.826172	0.887787	0.826172	0.868561	0.826172	0.892593	0.826172	0.975601	0.826172	0.934067	0.826172	0.450211	0.826172	0.365814	0.826172	0.991577	0.826172	0.957031	0.826172	0.999229
212	0.830078	0.995956	0.830078	0.969925	0.830078	0.345627	0.830078	0.887787	0.830078	0.871597	0.830078	0.901154	0.830078	0.976517	0.830078	0.944397	0.830078	0.460175	0.830078	0.3759	0.830078	0.991745	0.830078	0.957031	0.830078	0.999313
213	0.833984	0.996155	0.833984	0.970551	0.833984	0.345627	0.833984	0.895599	0.833984	0.874268	0.833984	0.909912	0.833984	0.976517	0.833984	0.954422	0.833984	0.460175	0.833984	0.386597	0.833984	0.991943	0.833984	0.957031	0.833984	0.999392
214	0.837891	0.996445	0.837891	0.971268	0.837891	0.360291	0.837891	0.903381	0.837891	0.876892	0.837891	0.91745	0.837891	0.977631	0.837891	0.96286	0.837891	0.469971	0.837891	0.397446	0.837891	0.99234	0.837891	0.957031	0.837891	0.99945
215	0.841797	0.996689	0.841797	0.971802	0.841797	0.3759	0.841797	0.911041	0.841797	0.880249	0.841797	0.91745	0.841797	0.978928	0.841797	0.967499	0.841797	0.47963	0.841797	0.408737	0.841797	0.992706	0.841797	0.957031	0.841797	0.999492
216	0.845703	0.996857	0.845703	0.972443	0.845703	0.393143	0.845703	0.919312	0.845703	0.883438	0.845703	0.924316	0.845703	0.97995	0.845703	0.971832	0.845703	0.4897	0.845703	0.420471	0.845703	0.992981	0.845703	0.957031	0.845703	0.999542
217	0.849609	0.996948	0.849609	0.972443	0.849609	0.393143	0.849609	0.919312	0.849609	0.886795	0.849609	0.931091	0.849609	0.981125	0.849609	0.974579	0.849609	0.499878	0.849609	0.433273	0.849609	0.993195	0.849609	0.957031	0.849609	0.999596
218	0.853516	0.996948	0.853516	0.973129	0.853516	0.409332	0.853516	0.926712	0.853516	0.8909	0.853516	0.937347	0.853516	0.982422	0.853516	0.976318	0.853516	0.509628	0.853516	0.447418	0.853516	0.993317	0.853516	0.957031	0.853516	0.999658
219	0.857422	0.997238	0.857422	0.973694	0.857422	0.425674	0.857422	0.934082	0.857422	0.8909	0.857422	0.942352	0.857422	0.983658	0.857422	0.978104	0.857422	0.509628	0.857422	0.462692	0.857422	0.993454	0.857422	0.957031	0.857422	0.999708
220	0.861328	0.997391	0.861328	0.974258	0.861328	0.425674	0.861328	0.94104	0.861328	0.894714	0.861328	0.946198	0.861328	0.985062	0.861328	0.980453	0.861328	0.521225	0.861328	0.462692	0.861328	0.993591	0.861328	0.957031	0.861328	0.99975
221	0.865234	0.997604	0.865234	0.97496	0.865234	0.442612	0.865234	0.94809	0.865234	0.898315	0.865234	0.949661	0.865234	0.986404	0.865234	0.984573	0.865234	0.53363	0.865234	0.478058	0.865234	0.993805	0.865234	0.957031	0.865234	0.999779
222	0.869141	0.997757	0.869141	0.975388	0.869141	0.460373	0.869141	0.94809	0.869141	0.902573	0.869141	0.952835	0.869141	0.987869	0.869141	0.987228	0.869141	0.545532	0.869141	0.493591	0.869141	0.994034	0.869141	0.957031	0.869141	0.999812
223	0.873047	0.997879	0.873047	0.976135	0.873047	0.47995	0.873047	0.954178	0.873047	0.906479	0.873047	0.952835	0.873047	0.987869	0.873047	0.98764	0.873047	0.55751	0.873047	0.509796	0.873047	0.994278	0.873047	0.957031	0.873047	0.999846
224	0.876953	0.997986	0.876953	0.976135	0.876953	0.47995	0.876953	0.959839	0.876953	0.909897	0.876953	0.956085	0.876953	0.989166	0.876953	0.988159	0.876953	0.57016	0.876953	0.526108	0.876953	0.994568	0.876953	0.957031	0.876953	0.999858
225	0.880859	0.998077	0.880859	0.976624	0.880859	0.500443	0.880859	0.964828	0.880859	0.914215	0.880859	0.958786	0.880859	0.990555	0.880859	0.988586	0.880859	0.57016	0.880859	0.542923	0.880859	0.994781	0.880859	0.957031	0.880859	0.999867
226	0.884766	0.998276	0.884766	0.977081	0.884766	0.520172	0.884766	0.969482	0.884766	0.919434	0.884766	0.961212	0.884766	0.991852	0.884766	0.989319	0.884766	0.584	0.884766	0.559875	0.884766	0.995117	0.884766	0.957031	0.884766	0.999896
227	0.888672	0.998276	0.888672	0.977524	0.888672	0.520172	0.888672	0.969482	0.888672	0.924164	0.888672	0.963547	0.888672	0.992889	0.888672	0.990067	0.888672	0.599121	0.888672	0.577057	0.888672	0.995331	0.888672	0.957031	0.888672	0.999908
228	0.892578	0.998459	0.892578	0.977951	0.892578	0.540573	0.892578	0.973495	0.892578	0.924164	0.892578	0.965561	0.892578	0.994156	0.892578	0.991043	0.892578	0.615326	0.892578	0.593353	0.892578	0.995529	0.892578	0.957031	0.892578	0.999921
229	0.896484	0.998566	0.896484	0.978409	0.896484	0.563766	0.896484	0.976974	0.896484	0.929504	0.896484	0.968292	0.896484	0.995148	0.896484	0.991806	0.896484	0.635101	0.896484	0.593353	0.896484	0.995743	0.896484	0.957031	0.896484	0.999929
230	0.900391	0.998764	0.900391	0.978775	0.900391	0.590363	0.900391	0.979889	0.900391	0.934494	0.900391	0.970291	0.900391	0.995743	0.900391	0.99263	0.900391	0.656967	0.900391	0.60965	0.900391	0.995743	0.900391	0.957031	0.900391	0.999938
231	0.904297	0.998932	0.904297	0.979279	0.904297	0.590363	0.904297	0.979889	0.904297	0.939957	0.904297	0.970291	0.904297	0.99617	0.904297	0.993317	0.904297	0.656967	0.904297	0.624893	0.904297	0.995972	0.904297	0.957031	0.904297	0.99995
232	0.908203	0.999054	0.908203	0.979279	0.908203	0.624344	0.908203	0.982773	0.908203	0.945343	0.908203	0.972504	0.908203	0.996872	0.908203	0.993896	0.908203	0.68158	0.908203	0.640076	0.908203	0.996185	0.908203	0.957031	0.908203	0.999958
233	0.912109	0.9991	0.912109	0.979965	0.912109	0.666321	0.912109	0.98497	0.912109	0.951691	0.912109	0.974579	0.912109	0.997299	0.912109	0.994614	0.912109	0.709381	0.912109	0.655579	0.912109	0.996353	0.912109	0.957031	0.912109	0.999962
234	0.916016	0.999252	0.916016	0.980652	0.916016	0.666321	0.916016	0.987228	0.916016	0.959366	0.916016	0.9767	0.916016	0.997299	0.916016	0.995178	0.916016	0.742645	0.916016	0.670807	0.916016	0.99649	0.916016	0.957031	0.916016	0.999971
235	0.919922	0.99939	0.919922	0.981415	0.919922	0.718079	0.919922	0.989182	0.919922	0.966949	0.919922	0.979141	0.919922	0.997787	0.919922	0.995438	0.919922	0.791595	0.919922	0.686401	0.919922	0.99675	0.919922	0.957031	0.919922	0.999975
236	0.923828	0.999451	0.923828	0.982239	0.923828	0.768936	0.923828	0.989182	0.923828	0.9758	0.923828	0.981155	0.923828	0.998245	0.923828	0.995712	0.923828	0.869736	0.923828	0.700668	0.923828	0.996887	0.923828	0.957031	0.923828	0.999979
237	0.927734	0.999451	0.927734	0.983215	0.927734	0.821701	0.927734	0.991074	0.927734	0.9758	0.927734	0.983139	0.927734	0.998505	0.927734	0.995972	0.927734	0.869736	0.927734	0.715652	0.927734	0.997101	0.927734	0.957031	0.927734	0.999979
238	0.931641	0.999573	0.931641	0.984436	0.931641	0.821701	0.931641	0.992554	0.931641	0.983643	0.931641	0.985062	0.931641	0.998749	0.931641	0.996262	0.931641	0.930969	0.931641	0.715652	0.931641	0.99736	0.931641	0.957031	0.931641	0.999979
239	0.935547	0.999649	0.935547	0.985977	0.935547	0.878967	0.935547	0.994064	0.935547	0.989594	0.935547	0.985062	0.935547	0.999176	0.935547	0.996597	0.935547	0.958527	0.935547	0.730469	0.935547	0.997528	0.935547	0.957031	0.935547	0.999979
240	0.939453	0.999695	0.939453	0.985977	0.939453	0.921997	0.939453	0.995377	0.939453	0.992706	0.939453	0.987396	0.939453	0.999374	0.939453	0.997025	0.939453	0.974396	0.939453	0.744003	0.939453	0.997925	0.939453	0.957031	0.939453	0.999979
241	0.943359	0.999771	0.943359	0.987411	0.943359	0.921997	0.943359	0.995377	0.943359	0.994339	0.943359	0.990112	0.943359	0.999542	0.943359	0.997299	0.943359	0.98378	0.943359	0.758743	0.943359	0.99826	0.943359	0.957031	0.943359	0.999979
242	0.947266	0.999786	0.947266	0.989258	0.947266	0.955475	0.947266	0.996414	0.947266	0.995834	0.947266	0.992096	0.947266	0.999664	0.947266	0.997467	0.947266	0.98848	0.947266	0.773438	0.947266	0.998596	0.947266	0.957031	0.947266	0.999979
243	0.951172	0.999817	0.951172	0.991638	0.951172	0.97319	0.951172	0.997406	0.951172	0.996887	0.951172	0.993561	0.951172	0.999756	0.951172	0.997696	0.951172	0.98848	0.951172	0.788834	0.951172	0.99881	0.951172	0.957031	0.951172	0.999983
244	0.955078	0.999847	0.955078	0.994171	0.955078	0.981125	0.955078	0.998169	0.955078	0.997772	0.955078	0.995224	0.955078	0.999817	0.955078	0.997833	0.955078	0.992249	0.955078	0.808304	0.955078	0.998978	0.955078	0.957031	0.955078	0.999988
245	0.958984	0.999878	0.958984	0.995316	0.958984	0.981125	0.958984	0.998795	0.958984	0.998413	0.958984	0.99649	0.958984	0.999817	0.958984	0.998032	0.958984	0.994095	0.958984	0.837402	0.958984	0.999069	0.958984	0.957031	0.958984	0.999988
246	0.962891	0.999878	0.962891	0.996078	0.962891	0.986664	0.962891	0.998795	0.962891	0.998413	0.962891	0.99765	0.962891	0.999847	0.962891	0.998154	0.962891	0.995483	0.962891	0.898163	0.962891	0.999176	0.962891	0.957031	0.962891	0.999988
247	0.966797	0.999878	0.966797	0.997299	0.966797	0.990982	0.966797	0.999359	0.966797	0.998871	0.966797	0.99765	0.966797	0.999863	0.966797	0.998474	0.966797	0.996689	0.966797	0.898163	0.966797	0.999207	0.966797	0.957031	0.966797	0.999988
248	0.970703	0.999908	0.970703	0.997299	0.970703	0.990982	0.970703	0.999557	0.970703	0.999298	0.970703	0.998489	0.970703	0.999924	0.970703	0.99884	0.970703	0.997971	0.970703	0.95134	0.970703	0.999268	0.970703	0.957275	0.970703	0.999992
249	0.974609	0.999939	0.974609	0.998734	0.974609	0.99501	0.974609	0.999786	0.974609	0.999466	0.974609	0.999115	0.974609	0.999939	0.974609	0.999115	0.974609	0.997971	0.974609	0.979401	0.974609	0.999374	0.974609	0.95813	0.974609	0.999996
250	0.978516	0.999954	0.978516	0.999344	0.978516	0.998245	0.978516	0.999908	0.978516	0.999725	0.978516	0.999481	0.978516	0.999939	0.978516	0.999283	0.978516	0.99852	0.978516	0.992188	0.978516	0.999481	0.978516	0.963501	0.978516	0.999996
251	0.982422	0.999969	0.982422	0.999573	0.982422	0.999496	0.982422	0.999908	0.982422	0.999878	0.982422	0.999786	0.982422	0.999954	0.982422	0.999481	0.982422	0.999039	0.982422	0.997421	0.982422	0.999664	0.982422	0.973267	0.982422	0.999996
252	0.986328	0.999985	0.986328	0.99968	0.986328	0.999496	0.986328	0.999954	0.986328	0.999939	0.986328	0.999847	0.986328	0.999969	0.986328	0.999573	0.986328	0.999176	0.986328	0.999268	0.986328	0.999863	0.986328	0.986755	0.986328	0.999996
253	0.990234	0.999985	0.990234	0.999802	0.990234	0.999832	0.990234	0.999985	0.990234	0.999969	0.990234	0.999939	0.990234	0.999985	0.990234	0.999664	0.990234	0.999405	0.990234	0.999863	0.990234	0.999939	0.990234	0.995911	0.990234	0.999996
254	0.994141	0.999985	0.994141	0.999969	0.994141	0.999985	0.994141	0.999985	0.994141	0.999985	0.994141	0.999969	0.994141	0.999985	0.994141	0.999817	0.994141	0.999817	0.994141	0.999969	0.994141	0.999985	0.994141	0.999573	0.994141	0.999996
255	0.998047	1	0.998047	1	0.998047	1	0.998047	1	0.998047	1	0.998047	1	0.998047	1	0.998047	1	0.998047	1	0.998047	1	0.998047	1	0.998047	1	0.998047	1

## Sheet: Sup Fig. 5c
	female_k	female_Pk	house_k	house_Pk	jellybeans_k	jellybeans_Pk	mandrill_k	mandrill_Pk	lake_k	lake_Pk	peppers_k	peppers_Pk	male_k	male_Pk	camera_k	camera_Pk	clock_k	clock_Pk	plane_k	plane_Pk	cameraman_k	cameraman_Pk	phantom_k	phantom_Pk	flakes_k	flakes_Pk
0	1	2.15856e+07	1	2.51258e+07	1	5.08081e+07	1	1.21507e+07	1	1.03141e+08	1	2.04068e+07	1	3.68561e+07	1	1.64544e+08	1	1.11483e+08	1	2.50868e+07	1	9.89878e+07	1	1.31169e+06	1	4.04701e+08
1	2	2.51893e+07	2	5.67462e+07	2	2.53422e+07	2	2.54801e+07	2	3.70892e+07	2	3.70126e+07	2	4.00597e+07	2	4.10904e+07	2	6.34805e+07	2	1.4356e+07	2	4.04466e+07	2	860753	2	1.78616e+08
2	3	1.2189e+07	3	1.6162e+07	3	1.40448e+07	3	2.11354e+07	3	3.2574e+07	3	3.03819e+07	3	2.48181e+07	3	2.07426e+07	3	1.72145e+07	3	4.73205e+06	3	9.01293e+06	3	552358	3	2.96675e+08
3	4	1.1198e+07	4	6.72967e+06	4	1.32198e+07	4	1.55339e+07	4	1.0665e+07	4	2.5748e+07	4	1.97776e+07	4	1.8255e+07	4	7.02883e+06	4	4.11535e+06	4	9.60764e+06	4	580121	4	1.05597e+08
4	5	9.27549e+06	5	9.06447e+06	5	9.98202e+06	5	5.62011e+06	5	8.71396e+06	5	1.56659e+07	5	1.99285e+07	5	8.44014e+06	5	5.6055e+06	5	2.80994e+06	5	6.4386e+06	5	293312	5	5.14075e+07
5	6	7.09964e+06	6	6.94578e+06	6	7.51816e+06	6	3.10114e+06	6	1.23538e+07	6	1.63954e+07	6	1.37327e+07	6	7.00569e+06	6	6.42512e+06	6	2.01317e+06	6	6.34684e+06	6	577151	6	4.83008e+07
6	7	3.54313e+06	7	5.79012e+06	7	1.2067e+07	7	2.31363e+06	7	1.13845e+07	7	1.01794e+07	7	9.69103e+06	7	4.3119e+06	7	3.44143e+06	7	1.34436e+06	7	6.70678e+06	7	317229	7	2.3821e+07
7	8	2.68663e+06	8	6.14056e+06	8	8.47663e+06	8	2.06445e+06	8	1.54431e+07	8	1.06813e+07	8	7.41699e+06	8	4.28167e+06	8	4.56231e+06	8	1.17261e+06	8	4.22349e+06	8	337146	8	2.69471e+07
8	9	2.56893e+06	9	3.06567e+06	9	9.70613e+06	9	2.69626e+06	9	6.94049e+06	9	5.64633e+06	9	4.64008e+06	9	3.51657e+06	9	2.4341e+06	9	1.3641e+06	9	6.15952e+06	9	401726	9	2.13285e+07
9	10	2.64306e+06	10	2.67992e+06	10	8.34124e+06	10	3.16564e+06	10	4.2205e+06	10	9.2385e+06	10	3.78348e+06	10	2.4145e+06	10	3.63384e+06	10	942361	10	4.84676e+06	10	215912	10	1.84977e+07
10	11	2.75099e+06	11	3.01275e+06	11	9.77723e+06	11	2.03586e+06	11	4.90103e+06	11	4.49374e+06	11	5.44032e+06	11	2.12725e+06	11	3.04947e+06	11	646218	11	2.79409e+06	11	285299	11	1.91559e+07
11	12	2.49416e+06	12	3.75756e+06	12	6.58068e+06	12	1.30354e+06	12	5.04519e+06	12	5.87808e+06	12	4.27535e+06	12	2.70403e+06	12	2.35134e+06	12	953527	12	3.42388e+06	12	318956	12	1.31808e+07
12	13	2.04007e+06	13	3.21016e+06	13	6.25672e+06	13	1.62293e+06	13	3.81815e+06	13	3.83724e+06	13	2.82497e+06	13	2.06365e+06	13	2.31612e+06	13	858390	13	2.78906e+06	13	200891	13	1.68104e+07
13	14	1.04863e+06	14	2.08275e+06	14	7.11815e+06	14	1.22302e+06	14	4.68674e+06	14	3.34194e+06	14	3.09426e+06	14	1.82936e+06	14	2.82237e+06	14	810866	14	2.50611e+06	14	270820	14	1.23213e+07
14	15	1.07465e+06	15	2.23946e+06	15	3.54025e+06	15	1.34094e+06	15	5.24758e+06	15	4.05686e+06	15	3.18867e+06	15	1.38641e+06	15	2.00305e+06	15	944553	15	2.01907e+06	15	277960	15	1.19086e+07
15	16	1.02974e+06	16	1.51552e+06	16	2.91074e+06	16	1.08685e+06	16	3.96422e+06	16	2.65195e+06	16	2.36674e+06	16	1.03672e+06	16	1.95177e+06	16	970907	16	2.17706e+06	16	219084	16	1.21816e+07
16	17	1.16582e+06	17	1.67868e+06	17	1.96143e+06	17	1.18332e+06	17	2.90488e+06	17	2.31471e+06	17	2.47438e+06	17	1.18458e+06	17	2.1645e+06	17	769266	17	1.8084e+06	17	227419	17	9.13968e+06
17	18	798250	18	1.64387e+06	18	1.5093e+06	18	860149	18	1.83879e+06	18	1.87852e+06	18	2.18008e+06	18	1.08032e+06	18	2.12204e+06	18	532332	18	1.61366e+06	18	221137	18	6.79089e+06
18	19	572800	19	1.99986e+06	19	1.31676e+06	19	1.18502e+06	19	1.56858e+06	19	2.02742e+06	19	2.40234e+06	19	1.10777e+06	19	2.15375e+06	19	654546	19	1.53894e+06	19	172592	19	8.24299e+06
19	20	528119	20	1.57355e+06	20	1.53446e+06	20	948077	20	1.8971e+06	20	1.46574e+06	20	1.826e+06	20	1.34549e+06	20	2.06916e+06	20	757452	20	1.14214e+06	20	168082	20	6.16385e+06
20	21	657991	21	1.24228e+06	21	979515	21	1.08708e+06	21	2.23978e+06	21	1.69927e+06	21	1.90161e+06	21	887787	21	1.97835e+06	21	717147	21	1.14705e+06	21	176922	21	5.28064e+06
21	22	572096	22	894529	22	974938	22	1.03866e+06	22	2.50881e+06	22	1.3034e+06	22	1.47732e+06	22	879078	22	1.98128e+06	22	550273	22	1.06133e+06	22	135725	22	5.23203e+06
22	23	446809	23	991780	23	1.14731e+06	23	1.23115e+06	23	2.25389e+06	23	1.30997e+06	23	1.26936e+06	23	874728	23	1.57938e+06	23	447229	23	1.02581e+06	23	148332	23	4.1023e+06
23	24	367111	24	1.01258e+06	24	1.23902e+06	24	889044	24	1.61574e+06	24	1.2571e+06	24	1.05004e+06	24	719615	24	1.41481e+06	24	533569	24	860850	24	150175	24	4.6545e+06
24	25	489818	25	1.12726e+06	25	1.22687e+06	25	783383	25	1.55371e+06	25	1.36513e+06	25	1.46274e+06	25	579840	25	1.23033e+06	25	403289	25	979932	25	125674	25	4.19157e+06
25	26	422819	26	1.00529e+06	26	993236	26	700695	26	1.28946e+06	26	874265	26	1.11485e+06	26	646783	26	1.15907e+06	26	477073	26	917866	26	113256	26	3.70108e+06
26	27	461399	27	815524	27	1.05964e+06	27	616654	27	1.18973e+06	27	989578	27	1.02698e+06	27	669924	27	1.48537e+06	27	510727	27	1.09948e+06	27	120791	27	3.65749e+06
27	28	395474	28	567499	28	1.09911e+06	28	657960	28	1.23466e+06	28	833481	28	1.05856e+06	28	597317	28	1.00779e+06	28	386860	28	1.09489e+06	28	106664	28	3.74392e+06
28	29	356864	29	623911	29	1.0245e+06	29	670495	29	1.17595e+06	29	718302	29	958487	29	615699	29	848949	29	423913	29	1.00761e+06	29	87570.5	29	3.40607e+06
29	30	305785	30	581988	30	833200	30	583000	30	1.03336e+06	30	763066	30	908434	30	469620	30	987551	30	575046	30	796264	30	98880.6	30	3.10067e+06
30	31	261122	31	502953	31	784287	31	652435	31	1.02991e+06	31	708328	31	680624	31	545870	31	838856	31	365094	31	713118	31	91762	31	3.13901e+06
31	32	253597	32	581331	32	594581	32	506500	32	1.09919e+06	32	694056	32	945607	32	479227	32	447431	32	304622	32	621232	32	66652.2	32	3.10477e+06
32	33	310506	33	406269	33	683186	33	616371	33	957897	33	626884	33	734387	33	443472	33	523851	33	343803	33	651756	33	79321	33	2.55667e+06
33	34	305529	34	363890	34	694076	34	589588	34	870131	34	604325	34	791293	34	477253	34	513878	34	328719	34	616324	34	77087.6	34	2.37708e+06
34	35	308833	35	293053	35	546396	35	571268	35	990219	35	528295	35	724278	35	418133	35	372877	35	364328	35	562095	35	60906.4	35	2.15736e+06
35	36	322592	36	304760	36	514195	36	624860	36	922499	36	493320	36	656638	36	464257	36	563984	36	325744	36	462511	36	73107.5	36	2.20183e+06
36	37	326360	37	423342	37	451818	37	476651	37	919935	37	517339	37	704003	37	330502	37	469487	37	305970	37	697540	37	68872	37	2.6672e+06
37	38	258675	38	270267	38	386542	38	484745	38	1.05096e+06	38	523838	38	774169	38	363248	38	402344	38	263820	38	570588	38	58515.8	38	2.37396e+06
38	39	224685	39	216041	39	302251	39	527833	39	935125	39	516352	39	638910	39	338666	39	495056	39	204264	39	600661	39	69799.9	39	2.72939e+06
39	40	182353	40	188445	40	327226	40	491076	40	892411	40	398509	40	621579	40	363002	40	354599	40	263894	40	554139	40	59498.4	40	2.57824e+06
40	41	195162	41	304312	41	265590	41	455635	41	760468	41	416819	41	589329	41	381216	41	427922	41	304284	41	576211	41	51718	41	3.0224e+06
41	42	176018	42	225088	42	280621	42	477052	42	813827	42	350567	42	574340	42	332342	42	568690	42	233675	42	508293	42	52663.2	42	2.67864e+06
42	43	167156	43	235001	43	249623	43	571219	43	632763	43	382813	43	566530	43	386498	43	322702	43	226210	43	519736	43	50627.5	43	2.18086e+06
43	44	161322	44	194573	44	269535	44	577971	44	561661	44	309658	44	495476	44	315706	44	448626	44	248355	44	466166	44	47182.3	44	2.24151e+06
44	45	164552	45	244194	45	225884	45	508465	45	704126	45	266623	45	446523	45	346052	45	487140	45	206064	45	428429	45	51866.2	45	2.91129e+06
45	46	119180	46	191410	46	211164	46	551181	46	608834	46	323166	46	420185	46	334075	46	415035	46	188293	46	426903	46	48264.5	46	3.15067e+06
46	47	126219	47	185080	47	181133	47	487494	47	649928	47	241491	47	473667	47	312181	47	432206	47	234065	47	410115	47	47615	47	2.63157e+06
47	48	115042	48	152982	48	162026	48	474048	48	502608	48	284349	48	411092	48	314329	48	332078	48	201061	48	402219	48	44803.1	48	2.36949e+06
48	49	100346	49	183681	49	165378	49	427382	49	607228	49	276964	49	450100	49	261177	49	259054	49	217477	49	477138	49	48876.3	49	2.33059e+06
49	50	117956	50	116900	50	152024	50	378013	50	378018	50	245984	50	436931	50	337562	50	277815	50	163971	50	381030	50	41013.8	50	2.11811e+06
50	51	110202	51	157882	51	140468	51	457120	51	427375	51	252556	51	369195	51	252591	51	301497	51	219453	51	449148	51	37254.2	51	2.08029e+06
51	52	107380	52	127875	52	138730	52	430310	52	449704	52	211678	52	346782	52	265229	52	207188	52	146843	52	418024	52	32520.2	52	1.71286e+06
52	53	101685	53	131779	53	135476	53	420826	53	539431	53	223005	53	355792	53	248506	53	299005	53	149557	53	336017	53	29420.3	53	1.6544e+06
53	54	112325	54	124337	54	130994	54	422875	54	471316	54	231171	54	328402	54	243187	54	264038	54	180693	54	405357	54	33727.6	54	1.94941e+06
54	55	98507.1	55	92246.9	55	108583	55	423414	55	412116	55	176939	55	312088	55	269774	55	207093	55	142370	55	354931	55	33364.6	55	1.84177e+06
55	56	87782.9	56	96284.5	56	83923.8	56	436478	56	348612	56	218620	56	311621	56	213276	56	262649	56	159292	56	329356	56	31177.3	56	2.06855e+06
56	57	85445.6	57	89718.4	57	81595.1	57	469488	57	306106	57	198760	57	305135	57	233776	57	227344	57	164450	57	317470	57	32230.2	57	1.96125e+06
57	58	96233.7	58	82706.4	58	87854.4	58	393795	58	378625	58	155581	58	331012	58	200989	58	222473	58	160444	58	322033	58	30682.4	58	1.83075e+06
58	59	77969.8	59	73255.1	59	80958.5	59	367183	59	307912	59	143634	59	314423	59	222876	59	205489	59	111952	59	298662	59	28715.7	59	1.64928e+06
59	60	72583.3	60	68450.3	60	75976.5	60	320167	60	376367	60	172419	60	281312	60	177858	60	187662	60	124288	60	289805	60	26802.9	60	1.729e+06
60	61	74144.1	61	88039.3	61	68402.7	61	358563	61	316616	61	148707	61	250841	61	201020	61	164854	61	137756	61	312427	61	25684.2	61	1.66105e+06
61	62	61439.6	62	75277.9	62	65136	62	410252	62	360127	62	120469	62	343058	62	178531	62	148800	62	140663	62	281537	62	25585.8	62	1.77324e+06
62	63	66220.6	63	82997.1	63	64471.6	63	425542	63	277668	63	128161	63	255958	63	169789	63	146919	63	123713	63	242176	63	30156.4	63	1.82095e+06
63	64	60654.4	64	83827.2	64	60411.8	64	416749	64	295345	64	137188	64	267323	64	181100	64	126692	64	121227	64	266852	64	28030.3	64	1.85459e+06
64	65	55067.9	65	85881.9	65	45522.4	65	411078	65	223157	65	151177	65	275557	65	131335	65	147610	65	124341	65	276149			65	1.78763e+06
65	66	53944.3	66	67897.6	66	46592.4	66	437169	66	301197	66	138199	66	240341	66	161673	66	141470	66	94915.5	66	257699			66	1.74582e+06
66	67	57541.8	67	91747.4	67	47361.3	67	357344	67	289947	67	108017	67	266694	67	141485	67	133905	67	109913	67	241526			67	1.45447e+06
67	68	54004.6	68	91762.5	68	39512.4	68	354198	68	284021	68	116149	68	242525	68	156700	68	128185	68	119098	68	234976			68	1.40901e+06
68	69	58966.1	69	90761.4	69	41354.6	69	365355	69	267273	69	113350	69	212931	69	151608	69	120143	69	99496.1	69	240707			69	1.42674e+06
69	70	57288.9	70	95471.2	70	43010.5	70	365799	70	284386	70	109176	70	214778	70	127511	70	104184	70	102576	70	241323			70	1.30467e+06
70	71	50759.5	71	78539	71	35496.5	71	374795	71	229446	71	103416	71	209801	71	154828	71	80131.5	71	107576	71	271866			71	1.47501e+06
71	72	39479.7	72	86503.9	72	40891	72	391975	72	244477	72	94007.5	72	208400	72	104345	72	91370.5	72	95555.2	72	239905			72	1.51915e+06
72	73	48222.5	73	75023	73	37686.8	73	366818	73	235778	73	93741.9	73	214313	73	128245	73	88740.7	73	90875.5	73	227718			73	1.48548e+06
73	74	45022.7	74	77369.8	74	37360.1	74	337435	74	225993	74	92186.4	74	176055	74	104406	74	105134	74	86889.1	74	237066			74	1.28907e+06
74	75	35296.7	75	70109	75	31059.9	75	337239	75	216075	75	100269	75	214247	75	107479	75	82665.8	75	96564.6	75	239070			75	1.40521e+06
75	76	31231.3	76	65946.9	76	26982.3	76	292803	76	209309	76	90401.2	76	184695	76	123496	76	72395.9	76	83218.5	76	242660			76	1.39414e+06
76	77	34594.9	77	60274.4	77	30481.2	77	321805	77	219315	77	82329.3	77	178151	77	80896.1	77	76417	77	80371.6	77	216176			77	1.36235e+06
77	78	35063	78	53506.1	78	26587.4	78	367852	78	183085	78	87685.8	78	172712	78	105659	78	62280.6	78	94655.5	78	199825			78	1.47344e+06
78	79	33861	79	52097.9	79	19749.5	79	339608	79	173102	79	83090.5	79	154714	79	73847.8	79	59729.4	79	74225.6	79	197217			79	1.41031e+06
79	80	36424.6	80	50899.3	80	21722.1	80	333280	80	171044	80	85603.8	80	154662	80	89752.3	80	73845	80	68656.3	80	172441			80	1.39774e+06
80	81	30803.6	81	48567.1	81	20156	81	335478	81	178002	81	81320	81	157634	81	79572.6	81	52796.3	81	80166.4	81	156737			81	1.49141e+06
81	82	32930.2	82	41627.7	82	19010.7	82	323166	82	163637	82	69548.1	82	152893	82	72392.5	82	56381.1	82	73821.3	82	190616			82	1.32022e+06
82	83	31434.5	83	43065	83	20030.5	83	309415	83	153063	83	79110.7	83	142504	83	83175.7	83	69949.2	83	71980.8	83	196885			83	1.3434e+06
83	84	27958.2	84	34200.1	84	17597.6	84	314068	84	140426	84	76844.2	84	144875	84	68137.2	84	62473.2	84	71142	84	160553			84	1.39187e+06
84	85	25393.5	85	32097.8	85	16263.7	85	337893	85	149427	85	66933	85	140393	85	78221.1	85	51887.8	85	68197.9	85	160764			85	1.4462e+06
85	86	25320.7	86	39790.3	86	17669.6	86	339153	86	143985	86	66606.6	86	145057	86	64815	86	64028.8	86	69580	86	170002			86	1.40433e+06
86	87	21620.5	87	33447.2	87	14959.2	87	303652	87	140275	87	64232.8	87	130505	87	66935.5	87	52719.4	87	61559.8	87	135275			87	1.40637e+06
87	88	25429.3	88	32643.3	88	13024.8	88	321529	88	129837	88	68461.7	88	122988	88	65166.1	88	44914.5	88	63707.7	88	154521			88	1.3054e+06
88	89	20437.6	89	29756.4	89	11759.2	89	278927	89	119921	89	64918.9	89	114162	89	67882.2	89	48897.2	89	64237.3	89	129001			89	1.25883e+06
89	90	20963.9	90	32759.5	90	12382.8	90	299111	90	109635	90	64768.3	90	107082	90	65884.5	90	49348.3	90	57242.4	90	122441			90	1.32169e+06
90	91	19121.4	91	29204.3	91	11084.4	91	326789	91	108904	91	56774.7	91	114726	91	54379.3	91	54744.1	91	62560.2	91	134909			91	1.41814e+06
91	92	18698.3	92	28717.7	92	10245.1	92	289032	92	122412	92	61708.6	92	113798	92	53825.3	92	69725.3	92	63519.9	92	137352			92	1.55353e+06
92	93	17224.2	93	23499.1	93	8277.97	93	284458	93	124093	93	54420	93	115635	93	50872.7	93	45883.7	93	51762.1	93	132816			93	1.523e+06
93	94	17800.8	94	28006.3	94	7652.86	94	244187	94	110616	94	57257.1	94	99686.1	94	54347.4	94	40561.2	94	57345.1	94	137318			94	1.42966e+06
94	95	18211.9	95	25148.9	95	7611.93	95	257796	95	104401	95	49506.3	95	92792.5	95	44924.6	95	46529.5	95	57935.4	95	134074			95	1.41534e+06
95	96	17055.2	96	25116.5	96	7670.84	96	239675	96	92186.8	96	47530.1	96	89551.9	96	45020.7	96	37411.1	96	54073.1	96	126973			96	1.39742e+06
96	97	16774	97	31059.8	97	6637.86	97	255158	97	92249.3	97	44404	97	88773.7	97	47733.3	97	71905.6	97	54406.2	97	120318			97	1.30911e+06
97	98	14609.5	98	36525	98	6900.41	98	243533	98	90544.5	98	44605	98	81545.1	98	53601.4	98	46786.1	98	48670.3	98	114910			98	1.13364e+06
98	99	14979.8	99	38164.3	99	5817.99	99	226876	99	82143.9	99	49878.9	99	91446	99	45163.8	99	40284.6	99	53408.9	99	110518			99	1.1377e+06
99	100	15861.1	100	27765.6	100	5507.67	100	230277	100	78885.1	100	44044.8	100	88256.8	100	45879.1	100	44125.5	100	48832.4	100	104277			100	1.1941e+06
100	101	17648.8	101	28501.2	101	5319.82	101	247359	101	75439.3	101	42258.2	101	84006.8	101	41201.2	101	54413.7	101	51358.9	101	105422			101	1.32166e+06
101	102	15387.5	102	22988.9	102	4836.19	102	232377	102	65502.5	102	38992.3	102	79794.5	102	38597.6	102	29254.5	102	50167.6	102	108771			102	1.3162e+06
102	103	15925.1	103	21856.4	103	4625.29	103	210139	103	75525.5	103	38511.7	103	83669.2	103	44067.6	103	42588.7	103	46355.4	103	129909			103	1.24997e+06
103	104	14621.9	104	20881.6	104	4501.66	104	222190	104	69370	104	43819.2	104	82446.5	104	41664.6	104	39049.7	104	50813.5	104	113586			104	1.29107e+06
104	105	14330.8	105	19433.1	105	4239.11	105	201952	105	73960.2	105	38409.3	105	75344.1	105	44449.5	105	23989.9	105	49917.2	105	115910			105	1.37263e+06
105	106	14289	106	19354.6	106	3788.88	106	213587	106	70550.1	106	39058.5	106	68161.9	106	38457.9	106	32822.4	106	48867	106	100919			106	1.46608e+06
106	107	12769.3	107	19570.2	107	3852.92	107	218648	107	71735.5	107	38235.5	107	74998.6	107	42193.6	107	36111.9	107	47086.1	107	100837			107	1.39392e+06
107	108	13211.4	108	19269.9	108	3765.56	108	212329	108	62613.1	108	36209.9	108	66389.4	108	37508.6	108	28756.5	108	45676.7	108	96256.6			108	1.16905e+06
108	109	11831.6	109	18777.3	109	3319.46	109	183224	109	70216.3	109	37784	109	70515.4	109	40510	109	28849.6	109	45581.7	109	93978.3			109	1.09329e+06
109	110	11712.9	110	15865.9	110	3201.64	110	207542	110	61299.9	110	36151.1	110	60886	110	37542.8	110	23134.3	110	43119.8	110	98066.1			110	1.01511e+06
110	111	11540.6	111	16712.6	111	3584.62	111	212551	111	54377.9	111	34634.3	111	62373.3	111	33851.3	111	22846	111	46495.9	111	112676			111	1.1814e+06
111	112	11215	112	15063.9	112	2915.98	112	186312	112	60017.8	112	31119.4	112	60596	112	35018.8	112	29359.1	112	44920	112	102487			112	1.24914e+06
112	113	11429.5	113	16424.8	113	3012.05	113	200330	113	63286	113	32164.6	113	57835.4	113	29013.9	113	21357.3	113	45444.1	113	100375			113	1.19713e+06
113	114	10348.8	114	13997.1	114	2784.3	114	187198	114	57255.5	114	30167.4	114	53983	114	39791.2	114	16574.2	114	43625.7	114	105439			114	1.16231e+06
114	115	10156.1	115	13965.4	115	2741.16	115	180383	115	52069.4	115	33837.2	115	58905.6	115	30718.5	115	21687.6	115	42654.6	115	92426.5			115	1.16342e+06
115	116	10610.2	116	14844.8	116	2894.59	116	177463	116	58945.3	116	31157.9	116	53597.9	116	34606.2	116	19390.3	116	43568.4	116	92161.2			116	1.18238e+06
116	117	9671.96	117	14001.2	117	2397.08	117	187723	117	54213.6	117	32133.3	117	60066.3	117	34850.1	117	19123.9	117	42656.5	117	82159.8			117	1.05172e+06
117	118	10385.4	118	15326.5	118	2421.35	118	183770	118	45938.2	118	31860.4	118	55874.1	118	32904.4	118	18297.3	118	44148.1	118	84629.9			118	1.05514e+06
118	119	9456.86	119	13590.8	119	2363.27	119	162378	119	44805.6	119	30782.6	119	51991	119	34653.7	119	13856.1	119	43245.3	119	84522.9			119	1.13402e+06
119	120	8954.31	120	13083.6	120	2380.3	120	183732	120	42344.4	120	31769.5	120	51319.2	120	26968.5	120	14941.5	120	40321	120	82692.6			120	1.1429e+06
120	121	9611.96	121	13551.4	121	2240.16	121	179529	121	44263	121	28601.3	121	46635.9	121	38430.1	121	18045.1	121	41962.5	121	88795.4			121	1.14573e+06
121	122	9818.09	122	13082.9	122	2140.71	122	185645	122	43685.5	122	27023.5	122	46856.4	122	28173.4	122	13147.3	122	41667.6	122	91959.7			122	1.11139e+06
122	123	8749.28	123	12730.6	123	2127.25	123	175517	123	38361.5	123	25966.1	123	45898.7	123	32279.2	123	11176.1	123	39854.4	123	87101.9			123	1.03892e+06
123	124	8807.23	124	12865.1	124	2168.86	124	150529	124	38325.1	124	30254.5	124	43586	124	34519.6	124	11944.5	124	42291.2	124	86588.1			124	998832
124	125	9413.54	125	13269.3	125	2082.54	125	163398	125	39459.3	125	30810.6	125	44401.5	125	30269.9	125	11071	125	40671.1	125	86326.9			125	957589
125	126	9573.31	126	12527.1	126	1982.1	126	142859	126	37906.2	126	30689.6	126	45908.5	126	34993.3	126	11526.6	126	41896.4	126	94968			126	920746
126	127	8964.82	127	12677.1	127	1942.69	127	145706	127	33043.4	127	28190.9	127	45325.2	127	27058.3	127	11115.8	127	39645.8	127	80788.7			127	1.04309e+06
127	128	6208.22	128	7228.4	128	1475.89	128	138701	128	31776.9	128	20675.2	128	40529.6	128	28081.2	128	9048.68	128	22437.2	128	65822.5			128	1.03057e+06

## Sheet: Sup Fig. 6b
	128	128_ssim	128_mse	64	64_ssim	64_mse	32	32_ssim	32_mse	16	16_ssim	16_mse	8	8_ssim	8_mse
0	0.994873	0.494897	0.782075	0.994873	0.782503	0.799508	0.994873	0.709232	0.809964	0.994873	0.554719	0.858309	0.994873	0.385249	0.94801
1	1.60522	0.513538	0.775311	1.60522	0.803121	0.751517	1.60522	0.760601	0.859972	1.60522	0.774143	0.702359	1.60522	0.385273	0.947986
2	2.21558	0.557451	0.726992	2.21558	0.822388	0.73048	2.21558	0.79446	0.753823	2.21558	0.852109	0.643081	2.21558	0.385725	0.949021
3	2.82593	0.568863	0.702965	2.82593	0.826814	0.708687	2.82593	0.817928	0.667414	2.82593	0.970925	0.100803	2.82593	0.383258	0.948391
4	3.43628	0.599772	0.666218	3.43628	0.831677	0.680475	3.43628	0.866065	0.543917	3.43628	0.97412	0.0598941	3.43628	0.381941	0.961835
5	4.04663	0.586158	0.635142	4.04663	0.844698	0.631693	4.04663	0.893519	0.466734	4.04663	0.976716	0.0573532	4.04663	0.382423	0.961615
6	4.65698	0.613585	0.621742	4.65698	0.844439	0.617436	4.65698	0.935159	0.273727	4.65698	0.973991	0.0616524	4.65698	0.382791	0.960064
7	5.26733	0.613803	0.612943	5.26733	0.858074	0.586342	5.26733	0.950819	0.215145	5.26733	0.97299	0.0632753	5.26733	0.382764	0.960065
8	5.87769	0.632013	0.590784	5.87769	0.867663	0.509438	5.87769	0.959632	0.147123	5.87769	0.974836	0.0616462	5.87769	0.382791	0.960002
9	6.48804	0.652517	0.578438	6.48804	0.888229	0.461611	6.48804	0.957894	0.134232	6.48804	0.974836	0.0616464	6.48804	0.383884	0.959759
10	7.09839	0.667199	0.543414	7.09839	0.893518	0.4556	7.09839	0.960382	0.133925	7.09839	0.974925	0.0613648	7.09839	0.383873	0.959764
11	7.70874	0.681815	0.513255	7.70874	0.90313	0.378337	7.70874	0.962976	0.132498	7.70874	0.974897	0.0614215	7.70874	0.383859	0.959755
12	8.31909	0.697359	0.481808	8.31909	0.915849	0.315687	8.31909	0.960705	0.133031	8.31909	0.974754	0.0617413	8.31909	0.383789	0.959895
13	8.92944	0.715749	0.465418	8.92944	0.923509	0.270029	8.92944	0.959751	0.132895	8.92944	0.974679	0.0616836	8.92944	0.383848	0.960024
14	9.53979	0.72327	0.452583	9.53979	0.930202	0.242693	9.53979	0.959508	0.133047	9.53979	0.974651	0.0616542	9.53979	0.381863	0.960651
15	10.1501	0.753151	0.427049	10.1501	0.934033	0.230486	10.1501	0.960924	0.132792	10.1501	0.97451	0.0620675	10.1501	0.381851	0.960645
16	10.7605	0.769964	0.40712	10.7605	0.939022	0.2205	10.7605	0.96152	0.132756	10.7605	0.974493	0.0621059	10.7605	0.381851	0.960646
17	11.3708	0.786808	0.391326	11.3708	0.943691	0.208326	11.3708	0.962306	0.132537	11.3708	0.974494	0.0621017	11.3708	0.381851	0.960646
18	11.9812	0.794989	0.379852	11.9812	0.948908	0.168447	11.9812	0.962982	0.132298	11.9812	0.974557	0.061992	11.9812	0.381824	0.960649
19	12.5916	0.80522	0.357515	12.5916	0.950693	0.134706	12.5916	0.964068	0.132347	12.5916	0.974256	0.0624935	12.5916	0.381939	0.960557
20	13.2019	0.819064	0.339972	13.2019	0.952516	0.128242	13.2019	0.96339	0.132361	13.2019	0.9747	0.0618829	13.2019	0.381939	0.960557
21	13.8123	0.826606	0.314802	13.8123	0.954423	0.117096	13.8123	0.965562	0.131999	13.8123	0.97473	0.0618391	13.8123	0.38194	0.960557
22	14.4226	0.828662	0.302036	14.4226	0.956324	0.112949	14.4226	0.966434	0.13177	14.4226	0.97479	0.0619995	14.4226	0.381555	0.961254
23	15.033	0.841594	0.262657	15.033	0.956438	0.106468	15.033	0.965715	0.131962	15.033	0.974779	0.0620483	15.033	0.608767	0.760678
24	15.6433	0.850974	0.245	15.6433	0.957987	0.104537	15.6433	0.968937	0.131224	15.6433	0.974769	0.0620492	15.6433	0.986248	0.0504408
25	16.2537	0.858382	0.22492	16.2537	0.95902	0.104311	16.2537	0.968204	0.131507	16.2537	0.97474	0.0621605	16.2537	0.986532	0.0502473
26	16.864	0.864365	0.210167	16.864	0.95757	0.104615	16.864	0.968618	0.131348	16.864	0.974755	0.0619905	16.864	0.98708	0.0496084
27	17.4744	0.87321	0.194505	17.4744	0.959413	0.104269	17.4744	0.969433	0.131135	17.4744	0.974637	0.0622313	17.4744	0.987436	0.049314
28	18.0847	0.876053	0.183984	18.0847	0.959217	0.102358	18.0847	0.969114	0.131233	18.0847	0.974678	0.0620216	18.0847	0.989042	0.0473497
29	18.6951	0.882185	0.177082	18.6951	0.958732	0.10252	18.6951	0.969708	0.131041	18.6951	0.975099	0.0614758	18.6951	0.988914	0.0476375
30	19.3054	0.887931	0.172684	19.3054	0.959951	0.102236	19.3054	0.969481	0.13109	19.3054	0.975655	0.060476	19.3054	0.98894	0.047238
31	19.9158	0.891748	0.166841	19.9158	0.960894	0.101807	19.9158	0.969502	0.131097	19.9158	0.975172	0.0610123	19.9158	0.989482	0.045971
32	20.5261	0.903111	0.158743	20.5261	0.96226	0.100453	20.5261	0.969482	0.131077	20.5261	0.976362	0.0588819	20.5261	0.989006	0.0468589
33	21.1365	0.909131	0.155579	21.1365	0.961731	0.100659	21.1365	0.969712	0.131099	21.1365	0.976647	0.0582679	21.1365	0.990471	0.0432297
34	21.7468	0.917381	0.149993	21.7468	0.960589	0.100911	21.7468	0.970228	0.130949	21.7468	0.976435	0.0586777	21.7468	0.990581	0.0426162
35	22.3572	0.920191	0.14763	22.3572	0.962454	0.100608	22.3572	0.970514	0.130877	22.3572	0.976443	0.0585019	22.3572	0.990729	0.0423273
36	22.9675	0.929265	0.143922	22.9675	0.961598	0.100797	22.9675	0.970382	0.130895	22.9675	0.976403	0.058282	22.9675	0.990872	0.0418402
37	23.5779	0.934112	0.139613	23.5779	0.961723	0.100698	23.5779	0.971106	0.130751	23.5779	0.976974	0.0565193	23.5779	0.990872	0.0418401
38	24.1882	0.940143	0.135045	24.1882	0.963071	0.100467	24.1882	0.971286	0.130693	24.1882	0.977569	0.0551672	24.1882	0.990811	0.0420195
39	24.7986	0.945601	0.128532	24.7986	0.962212	0.100581	24.7986	0.971425	0.130693	24.7986	0.977589	0.0551155	24.7986	0.991149	0.0412277
40	25.4089	0.950012	0.107202	25.4089	0.96339	0.100256	25.4089	0.972022	0.13037	25.4089	0.977589	0.0551155	25.4089	0.991149	0.0412276
41	26.0193	0.953745	0.0915111	26.0193	0.963321	0.100287	26.0193	0.972163	0.130284	26.0193	0.977589	0.0551158	26.0193	0.99116	0.0411919
42	26.6296	0.956682	0.0807963	26.6296	0.963091	0.100375	26.6296	0.972157	0.130292	26.6296	0.9777	0.0551029	26.6296	0.99116	0.0411929
43	27.24	0.958672	0.0776982	27.24	0.963935	0.100129	27.24	0.972129	0.130306	27.24	0.978021	0.0545493	27.24	0.991123	0.041238
44	27.8503	0.956998	0.0749422	27.8503	0.963771	0.100266	27.8503	0.972148	0.130318	27.8503	0.978022	0.0545424	27.8503	0.991123	0.041238
45	28.4607	0.95786	0.0722908	28.4607	0.964123	0.0995054	28.4607	0.974155	0.0444178	28.4607	0.978031	0.0544688	28.4607	0.991123	0.0412377
46	29.071	0.958912	0.0657705	29.071	0.964091	0.0994893	29.071	0.975344	0.043492	29.071	0.978012	0.0545701	29.071	0.991123	0.0412368
47	29.6814	0.960161	0.0639303	29.6814	0.964714	0.0992166	29.6814	0.975849	0.042931	29.6814	0.97802	0.0545041	29.6814	0.991122	0.0412389
48	30.2917	0.960316	0.0601589	30.2917	0.965576	0.0989179	30.2917	0.976272	0.0423773	30.2917	0.978115	0.054284	30.2917	0.991122	0.041239
49	30.9021	0.962382	0.0523165	30.9021	0.965976	0.0986957	30.9021	0.977101	0.0416651	30.9021	0.978147	0.0537669	30.9021	0.991122	0.041239
50	31.5125	0.963701	0.0499023	31.5125	0.966697	0.0983854	31.5125	0.977512	0.0410982	31.5125	0.978142	0.0537919	31.5125	0.991124	0.0412356
51	32.1228	0.9644	0.049619	32.1228	0.96735	0.098261	32.1228	0.977902	0.0408014	32.1228	0.978431	0.0530781	32.1228	0.991117	0.0412563
52	32.7332	0.96506	0.0472882	32.7332	0.96922	0.075464	32.7332	0.978327	0.0404877	32.7332	0.978606	0.0523458	32.7332	0.991117	0.0412575
53	33.3435	0.966487	0.0403918	33.3435	0.970119	0.0437634	33.3435	0.978749	0.0401654	33.3435	0.978537	0.0523877	33.3435	0.991107	0.041283
54	33.9539	0.966603	0.0401132	33.9539	0.970358	0.0435918	33.9539	0.979862	0.0393553	33.9539	0.979108	0.0516148	33.9539	0.991082	0.0413873
55	34.5642	0.967145	0.0396834	34.5642	0.970679	0.0433462	34.5642	0.980108	0.0391756	34.5642	0.979917	0.0507358	34.5642	0.991082	0.0413875
56	35.1746	0.967663	0.0389067	35.1746	0.971072	0.0430878	35.1746	0.980475	0.0388027	35.1746	0.979886	0.0507677	35.1746	0.991074	0.0413881
57	35.7849	0.969457	0.0379916	35.7849	0.971481	0.0427449	35.7849	0.980907	0.0384507	35.7849	0.981033	0.0496379	35.7849	0.990986	0.0421021
58	36.3953	0.969462	0.037107	36.3953	0.971595	0.0425731	36.3953	0.981158	0.0382449	36.3953	0.981919	0.0485084	36.3953	0.990986	0.0421022
59	37.0056	0.969344	0.0370925	37.0056	0.972053	0.0422719	37.0056	0.981757	0.0377068	37.0056	0.982011	0.0484317	37.0056	0.991188	0.0408825
60	37.616	0.970047	0.0369288	37.616	0.972362	0.0420346	37.616	0.982071	0.0374325	37.616	0.982558	0.0476426	37.616	0.991311	0.0401691
61	38.2263	0.970167	0.0368821	38.2263	0.972698	0.0415042	38.2263	0.982705	0.0368357	38.2263	0.983152	0.0470177	38.2263	0.991955	0.038258
62	38.8367	0.970187	0.0368416	38.8367	0.972884	0.0414469	38.8367	0.983225	0.0363478	38.8367	0.983341	0.0468114	38.8367	0.991984	0.038175
63	39.447	0.970741	0.0347605	39.447	0.973244	0.0409081	39.447	0.98367	0.0357732	39.447	0.983341	0.0468116	39.447	0.992656	0.0358647
64	40.0574	0.970929	0.0314679	40.0574	0.97344	0.0406174	40.0574	0.983881	0.0355908	40.0574	0.983763	0.0460904	40.0574	0.993786	0.0327403
65	40.6677	0.971293	0.0290941	40.6677	0.973693	0.040443	40.6677	0.98412	0.0353099	40.6677	0.983833	0.0461156	40.6677	0.993786	0.0327408
66	41.2781	0.97236	0.0279702	41.2781	0.973951	0.0401898	41.2781	0.984527	0.0349057	41.2781	0.985011	0.0446708	41.2781	0.994138	0.0319275
67	41.8884	0.972915	0.0275157	41.8884	0.974265	0.0399029	41.8884	0.984825	0.0345208	41.8884	0.985359	0.0442069	41.8884	0.994257	0.0313624
68	42.4988	0.973504	0.0270076	42.4988	0.974444	0.0397046	42.4988	0.984985	0.0343331	42.4988	0.986173	0.043066	42.4988	0.994483	0.0309491
69	43.1091	0.974036	0.0264537	43.1091	0.974734	0.039478	43.1091	0.985221	0.033941	43.1091	0.986076	0.0431943	43.1091	0.994483	0.0309492
70	43.7195	0.974294	0.0263326	43.7195	0.975	0.0392529	43.7195	0.985546	0.033522	43.7195	0.987206	0.0417513	43.7195	0.994857	0.0301475
71	44.3298	0.974538	0.0262304	44.3298	0.975339	0.0389897	44.3298	0.985831	0.0332186	44.3298	0.987253	0.0418363	44.3298	0.994982	0.0298741
72	44.9402	0.974707	0.0261728	44.9402	0.975473	0.038854	44.9402	0.986285	0.0325762	44.9402	0.988008	0.0405612	44.9402	0.995144	0.0295054
73	45.5505	0.975004	0.0260514	45.5505	0.975826	0.0385763	45.5505	0.986591	0.0322587	45.5505	0.988649	0.0393983	45.5505	0.995308	0.0291032
74	46.1609	0.975402	0.0249969	46.1609	0.976111	0.0383386	46.1609	0.986654	0.032171	46.1609	0.988604	0.0394435	46.1609	0.995815	0.0279341
75	46.7712	0.975628	0.0249071	46.7712	0.976314	0.0381664	46.7712	0.986636	0.0318192	46.7712	0.988817	0.039114	46.7712	0.996122	0.0269187
76	47.3816	0.975955	0.0247003	47.3816	0.976515	0.03798	47.3816	0.987052	0.0313999	47.3816	0.988867	0.0389779	47.3816	0.996133	0.0268914
77	47.9919	0.976209	0.0245795	47.9919	0.976763	0.0377541	47.9919	0.987485	0.030857	47.9919	0.989737	0.0378013	47.9919	0.996403	0.0261977
78	48.6023	0.976666	0.0243346	48.6023	0.976986	0.0375901	48.6023	0.987694	0.0306331	48.6023	0.990025	0.0374902	48.6023	0.996465	0.0260114
79	49.2126	0.976756	0.0243278	49.2126	0.977274	0.037379	49.2126	0.987837	0.030476	49.2126	0.990074	0.0373296	49.2126	0.997556	0.0231703
80	49.823	0.976968	0.0242408	49.823	0.977645	0.0370739	49.823	0.988146	0.0300569	49.823	0.990488	0.0361668	49.823	0.997761	0.0222736

## Sheet: Sup Fig. 7b
	1	1_ssim	1_mse	2	2_ssim	2_mse	4	4_ssim	4_mse	8	8_ssim	8_mse
0	0.994873	0.508702	0.826452	0.994873	0.308854	0.972132	0.994873	0.173007	1.10034	0.994873	0.0868473	1.10189
1	1.60522	0.544217	0.784591	1.60522	0.344171	0.934456	1.60522	0.206977	0.930501	1.60522	0.107166	1.01429
2	2.21558	0.575979	0.739367	2.21558	0.36936	0.872252	2.21558	0.216676	0.912686	2.21558	0.129951	0.941437
3	2.82593	0.59816	0.686524	2.82593	0.374733	0.88206	2.82593	0.230282	0.907619	2.82593	0.146744	0.90975
4	3.43628	0.626635	0.656717	3.43628	0.414548	0.819443	3.43628	0.253671	0.841989	3.43628	0.157556	0.901206
5	4.04663	0.639869	0.637021	4.04663	0.418634	0.807011	4.04663	0.262083	0.829318	4.04663	0.169351	0.892916
6	4.65698	0.641153	0.629144	4.65698	0.43041	0.799293	4.65698	0.274774	0.807139	4.65698	0.175844	0.884747
7	5.26733	0.648819	0.635765	5.26733	0.446407	0.784338	5.26733	0.282133	0.802133	5.26733	0.181453	0.889151
8	5.87769	0.667192	0.623586	5.87769	0.455146	0.768493	5.87769	0.305556	0.785979	5.87769	0.188932	0.885381
9	6.48804	0.688257	0.593755	6.48804	0.465596	0.751767	6.48804	0.311103	0.768833	6.48804	0.19876	0.876173
10	7.09839	0.696141	0.57027	7.09839	0.467646	0.768323	7.09839	0.307503	0.779576	7.09839	0.204284	0.874406
11	7.70874	0.714408	0.552904	7.70874	0.468791	0.761081	7.70874	0.313052	0.785064	7.70874	0.213009	0.862328
12	8.31909	0.733586	0.536302	8.31909	0.480421	0.750636	8.31909	0.315712	0.790816	8.31909	0.217368	0.860155
13	8.92944	0.733952	0.534804	8.92944	0.480252	0.754181	8.92944	0.327661	0.765282	8.92944	0.222806	0.858113
14	9.53979	0.745975	0.503878	9.53979	0.491541	0.743559	9.53979	0.338202	0.74907	9.53979	0.224486	0.870966
15	10.1501	0.761725	0.48538	10.1501	0.493965	0.750387	10.1501	0.349286	0.747919	10.1501	0.232394	0.852911
16	10.7605	0.772198	0.469249	10.7605	0.497987	0.751907	10.7605	0.359629	0.739457	10.7605	0.238152	0.851238
17	11.3708	0.782899	0.410096	11.3708	0.50813	0.728413	11.3708	0.368068	0.733662	11.3708	0.248418	0.844678
18	11.9812	0.788493	0.388312	11.9812	0.523673	0.710768	11.9812	0.377925	0.713606	11.9812	0.257333	0.844177
19	12.5916	0.80221	0.364187	12.5916	0.532324	0.696768	12.5916	0.386262	0.706962	12.5916	0.262668	0.838369
20	13.2019	0.821975	0.321452	13.2019	0.537364	0.697695	13.2019	0.396828	0.698922	13.2019	0.269731	0.833868
21	13.8123	0.834553	0.30426	13.8123	0.548605	0.675	13.8123	0.408313	0.693274	13.8123	0.275755	0.838847
22	14.4226	0.841906	0.289553	14.4226	0.563441	0.65726	14.4226	0.409489	0.693116	14.4226	0.285685	0.826472
23	15.033	0.849797	0.264798	15.033	0.564917	0.644426	15.033	0.425637	0.677683	15.033	0.291853	0.823651
24	15.6433	0.858219	0.247135	15.6433	0.576556	0.638688	15.6433	0.431745	0.673836	15.6433	0.294857	0.822175
25	16.2537	0.864499	0.229433	16.2537	0.590752	0.641758	16.2537	0.436368	0.667752	16.2537	0.30347	0.817535
26	16.864	0.873009	0.209062	16.864	0.592519	0.635016	16.864	0.441984	0.674789	16.864	0.307442	0.816551
27	17.4744	0.87846	0.191744	17.4744	0.608117	0.611418	17.4744	0.450335	0.652093	17.4744	0.314132	0.812177
28	18.0847	0.88406	0.178794	18.0847	0.620622	0.587527	18.0847	0.455969	0.64695	18.0847	0.3176	0.809753
29	18.6951	0.893206	0.173078	18.6951	0.625912	0.583958	18.6951	0.468685	0.63318	18.6951	0.324746	0.815027
30	19.3054	0.897685	0.167588	19.3054	0.643354	0.574538	19.3054	0.473734	0.633458	19.3054	0.332621	0.802767
31	19.9158	0.90337	0.163917	19.9158	0.661192	0.545172	19.9158	0.487208	0.617875	19.9158	0.337507	0.799359
32	20.5261	0.906226	0.162136	20.5261	0.678323	0.528078	20.5261	0.495596	0.615932	20.5261	0.342846	0.796113
33	21.1365	0.913442	0.159692	21.1365	0.69667	0.501637	21.1365	0.501189	0.610614	21.1365	0.349269	0.79355
34	21.7468	0.918628	0.155425	21.7468	0.713376	0.483608	21.7468	0.506838	0.610844	21.7468	0.35434	0.79164
35	22.3572	0.925686	0.1533	22.3572	0.720966	0.474098	22.3572	0.51186	0.605388	22.3572	0.362586	0.791348
36	22.9675	0.932113	0.148517	22.9675	0.731526	0.457854	22.9675	0.520535	0.5958	22.9675	0.371599	0.783178
37	23.5779	0.938963	0.145221	23.5779	0.742736	0.425481	23.5779	0.526488	0.590859	23.5779	0.376991	0.779441
38	24.1882	0.944104	0.13763	24.1882	0.750833	0.417545	24.1882	0.531724	0.589215	24.1882	0.381354	0.776681
39	24.7986	0.948295	0.119659	24.7986	0.756857	0.400505	24.7986	0.534858	0.604895	24.7986	0.390508	0.771059
40	25.4089	0.953311	0.0925259	25.4089	0.764051	0.389642	25.4089	0.544343	0.585503	25.4089	0.394993	0.768052
41	26.0193	0.957409	0.0804622	26.0193	0.762878	0.373785	26.0193	0.553837	0.581458	26.0193	0.40665	0.762414
42	26.6296	0.958765	0.0729632	26.6296	0.775771	0.358179	26.6296	0.555002	0.574477	26.6296	0.411161	0.75956
43	27.24	0.958372	0.070296	27.24	0.785655	0.346982	27.24	0.570733	0.566501	27.24	0.416433	0.756483
44	27.8503	0.95919	0.0684503	27.8503	0.791795	0.332427	27.8503	0.575161	0.573187	27.8503	0.424074	0.751961
45	28.4607	0.959138	0.0675159	28.4607	0.805677	0.313909	28.4607	0.588157	0.55105	28.4607	0.43079	0.750831
46	29.071	0.960047	0.066478	29.071	0.81423	0.300332	29.071	0.59677	0.546058	29.071	0.43682	0.744487
47	29.6814	0.962199	0.0591632	29.6814	0.81777	0.292625	29.6814	0.600852	0.549812	29.6814	0.446247	0.742802
48	30.2917	0.962318	0.0542724	30.2917	0.823653	0.283724	30.2917	0.609734	0.543965	30.2917	0.454027	0.733275
49	30.9021	0.963091	0.0503291	30.9021	0.831723	0.272787	30.9021	0.616582	0.53394	30.9021	0.462105	0.73339
50	31.5125	0.963858	0.0498493	31.5125	0.840645	0.266104	31.5125	0.62622	0.52483	31.5125	0.47069	0.722183
51	32.1228	0.964131	0.0476399	32.1228	0.846283	0.262144	32.1228	0.632069	0.521622	32.1228	0.475058	0.721929
52	32.7332	0.96468	0.0449834	32.7332	0.850334	0.257438	32.7332	0.640669	0.516724	32.7332	0.479229	0.71729
53	33.3435	0.965984	0.0442465	33.3435	0.856845	0.253651	33.3435	0.646143	0.516746	33.3435	0.488439	0.711472
54	33.9539	0.96871	0.0429824	33.9539	0.859043	0.250813	33.9539	0.654719	0.509588	33.9539	0.495029	0.706
55	34.5642	0.969167	0.0428219	34.5642	0.864405	0.248666	34.5642	0.66114	0.506557	34.5642	0.501211	0.701756
56	35.1746	0.969395	0.0427609	35.1746	0.870112	0.246201	35.1746	0.668704	0.500944	35.1746	0.506748	0.699548
57	35.7849	0.969751	0.0426742	35.7849	0.881837	0.241312	35.7849	0.676244	0.496821	35.7849	0.514511	0.694887
58	36.3953	0.970139	0.0425406	36.3953	0.887143	0.239969	36.3953	0.686282	0.491343	36.3953	0.522344	0.692744
59	37.0056	0.970409	0.0401423	37.0056	0.890555	0.239119	37.0056	0.691498	0.494518	37.0056	0.532024	0.682061
60	37.616	0.970829	0.0400432	37.616	0.894585	0.236961	37.616	0.701357	0.485692	37.616	0.537168	0.679618
61	38.2263	0.970992	0.0400594	38.2263	0.903547	0.229898	38.2263	0.712649	0.47772	38.2263	0.541728	0.68122
62	38.8367	0.971357	0.039587	38.8367	0.911502	0.223551	38.8367	0.71581	0.479884	38.8367	0.55248	0.66499
63	39.447	0.971409	0.0395556	39.447	0.913181	0.222754	39.447	0.721713	0.471497	39.447	0.557512	0.661613
64	40.0574	0.972122	0.0391897	40.0574	0.920688	0.216107	40.0574	0.727464	0.468206	40.0574	0.565389	0.655684
65	40.6677	0.972584	0.0334851	40.6677	0.927126	0.205156	40.6677	0.736819	0.460504	40.6677	0.568652	0.653906
66	41.2781	0.974673	0.0261423	41.2781	0.930485	0.200007	41.2781	0.738819	0.466801	41.2781	0.574533	0.648038
67	41.8884	0.975608	0.0255863	41.8884	0.936305	0.183616	41.8884	0.747713	0.453437	41.8884	0.581723	0.648106
68	42.4988	0.97604	0.0251955	42.4988	0.942172	0.16426	42.4988	0.761664	0.437592	42.4988	0.593617	0.63328
69	43.1091	0.97623	0.0251393	43.1091	0.948454	0.138899	43.1091	0.772214	0.426308	43.1091	0.596754	0.630884
70	43.7195	0.976504	0.0246268	43.7195	0.953608	0.122334	43.7195	0.782187	0.416781	43.7195	0.606022	0.629009
71	44.3298	0.976706	0.0245143	44.3298	0.953465	0.111915	44.3298	0.787811	0.413399	44.3298	0.615502	0.629009
72	44.9402	0.977158	0.0239906	44.9402	0.955443	0.10069	44.9402	0.795003	0.40517	44.9402	0.622361	0.611872
73	45.5505	0.977501	0.0234855	45.5505	0.957972	0.0957435	45.5505	0.801242	0.394638	45.5505	0.629857	0.606123
74	46.1609	0.977724	0.0233951	46.1609	0.96028	0.0931026	46.1609	0.80537	0.388727	46.1609	0.63461	0.601391
75	46.7712	0.977946	0.023228	46.7712	0.960583	0.0866583	46.7712	0.809897	0.38548	46.7712	0.639469	0.6004
76	47.3816	0.978166	0.0231371	47.3816	0.964776	0.0749017	47.3816	0.819455	0.376553	47.3816	0.649004	0.590536
77	47.9919	0.9786	0.0228333	47.9919	0.96714	0.0674964	47.9919	0.825113	0.370678	47.9919	0.655105	0.586824
78	48.6023	0.97899	0.0222452	48.6023	0.971466	0.0562993	48.6023	0.831163	0.377913	48.6023	0.663047	0.578713
79	49.2126	0.979367	0.0220458	49.2126	0.971992	0.0559361	49.2126	0.838835	0.359356	49.2126	0.667747	0.57471
80	49.823	0.979614	0.0219213	49.823	0.973351	0.0522454	49.823	0.844083	0.355092	49.823	0.672883	0.571448

## Sheet: Sup Fig. 9
x_top	ERD	x_bottom	scan_coverage
0	2.52375e+06	0	1
1	2.37522e+06	2	2
2	2.03119e+06	4	3
3	1.82152e+06	6	4
4	1.71834e+06	8	6
5	1.48753e+06	10	7
6	1.36311e+06	12	8
7	1.16403e+06	14	10
8	1.05798e+06	16	11
9	1.01072e+06	18	12
10	956799	20	13
11	898969	22	14
12	897791	24	15
13	882667	26	16
14	861307	28	18
15	854272	30	19
16	829366	32	20
17	800689	34	21
18	776950	36	22
19	764204	38	24
20	727107	40	24
21	692258	42	26
22	668929	44	27
23	632747	46	29
24	611319	48	30
25	597277	50	31
26	567115	52	32
27	529209	54	33
28	481747	56	35
29	469417	58	35
30	474427
31	440258
32	422609
33	402139
34	381235
35	374249
36	357010
37	342507
38	322202
39	323147
40	304729
41	287663
42	274854
43	275613
44	252665
45	225278
46	224365
47	204313
48	188454
49	170959
50	151787
51	140217
52	129688
53	126012
54	113802
55	100100
56	89177.6
57	70313.1
58	68366.1
59	56857.5
